# Supplementary material for: EST-Microsatellite Types and Structural Scenarios in European Hake Fisheries
Source: MDPI journal article supplement (doi:10.3390/ani12111462), 2022-06-04
Supplement: s1 [file s1]

*Article*

# EST-Microsatellite Types and Structural Scenarios in European Hake Fisheries

**Alfonso Pita <sup>†</sup>, María Fernández-Míguez <sup>†</sup> and Pablo Presa <sup>\*</sup>**

Laboratory of Marine Genetic Resources (ReXenMar), Centro de Investigación Mariña, Universidade de Vigo, Vigo 36310, Spain; alpita@uvigo.es (A.P.); mariafernandezm@uvigo.es (M.F.-M.)

<sup>\*</sup> Correspondence: pressa@uvigo.es (P.P.)

<sup>†</sup> These authors contributed equally to this work.

**Table S1.** Primer sequences and gene diversity of microsatellite markers from *Merluccius merluccius*: *Mmer*-hk, anonymous markers; *Mmer*-EST, 23 new EST-microsatellites characterized in this study.

| PCR                       | Locus         | Primer sequences (5'– 3')          | Repeat motif        | T (°C) – MgCl <sub>2</sub> [mM] | Population        | N   | N <sub>a</sub> | H <sub>O</sub> | H <sub>E</sub> | F <sub>IS</sub> | Allele size range (bp) |
|---------------------------|---------------|------------------------------------|---------------------|---------------------------------|-------------------|-----|----------------|----------------|----------------|-----------------|------------------------|
| Anonymous microsatellites |               |                                    |                     |                                 |                   |     |                |                |                |                 |                        |
| Simplex                   | Mmer-hk29     | F: 6-FAMGGGTTGCCAGTGGTTACGGGTGTG   | (GT) <sub>12</sub>  | 55 - 1.0                        | Atlantic Ocean    | 81  | 15             | 0.370          | 0.901          | 0.589*          | 138-172                |
|                           |               | R: CGGCGACTGCGTGTCTTGCTGCTGTG      |                     |                                 | Mediterranean Sea | 62  | 13             | 0.403          | 0.827          | 0.512*          |                        |
| Simplex                   | Mmer-hk34b    | F: NEDTATTGTCWATCTCTCTATCGGTGA     | (GT) <sub>24</sub>  | 55 - 1.7                        | Atlantic Ocean    | 107 | 22             | 0.654          | 0.917          | 0.287*          | 106-152                |
|                           |               | R: AAAAAGATGCGAGGGACAGCTAAA        |                     |                                 | Mediterranean Sea | 78  | 19             | 0.526          | 0.921          | 0.429*          |                        |
| Triplex 1                 | Mmer-hk3b     | F: 6-FAMACCCGGTCTCCTCACTAGCAGTTT   | (GT) <sub>17</sub>  | 55 - 1.5                        | Atlantic Ocean    | 85  | 11             | 0.824          | 0.839          | 0.018           | 322-348                |
|                           |               | R: AGGCTTCAGGAACAGAATGCTATG        |                     |                                 | Mediterranean Sea | 75  | 10             | 0.600          | 0.682          | 0.120*          |                        |
|                           | Mmer-hk9b     | F: HEXCAAGCAAGACCTGGAGGGGAAAGAGATG | (GA) <sub>23</sub>  |                                 | Atlantic Ocean    | 95  | 29             | 0.642          | 0.960          | 0.331*          | 121-181                |
|                           |               | R: GTGCGTGCCTCCCAGGAGTTGCTTGTAG    |                     |                                 | Mediterranean Sea | 79  | 29             | 0.766          | 0.958          | 0.200*          |                        |
|                           | Mmer-hk20     | F: NEDTCGGCTGCAGGTCAGTTCAGTTTTT    | (GT) <sub>13</sub>  |                                 | Atlantic Ocean    | 108 | 19             | 0.806          | 0.911          | 0.116*          | 203-255                |
|                           |               | R: GTGCCTGTTTTCTGCCATGCT           |                     |                                 | Mediterranean Sea | 81  | 17             | 0.815          | 0.882          | 0.076*          |                        |
| EST-microsatellites       |               |                                    |                     |                                 |                   |     |                |                |                |                 |                        |
| Triplex 2                 | Mmer-EST_1.1  | F: 6-FAMCGTGTCGTAAACTCGCGTC        | (AAG) <sub>10</sub> | 60 - 1.5                        | Atlantic Ocean    | 93  | 12             | 0.688          | 0.763          | 0.099           | 213-255                |
|                           |               | R: ACACAGCGTTGCATAAAGCG            |                     |                                 | Mediterranean Sea | 47  | 17             | 0.681          | 0.913          | 0.255*          |                        |
|                           | Mmer-EST_11.2 | F: HEXGGATACAGGGAGTAACCGTGG        | (AC) <sub>8</sub>   |                                 | Atlantic Ocean    | 106 | 27             | 0.755          | 0.927          | 0.186*          | 140-210                |
|                           |               | R: CGCCAATCTGCATTATCTGC            |                     |                                 | Mediterranean Sea | 45  | 30             | 0.778          | 0.965          | 0.194*          |                        |
| Tetraplex 1               | Mmer-EST_11.4 | F: 6-FAMAGCGGTTCTGGTTGAGAGGT       | (CCG) <sub>6</sub>  |                                 | Atlantic Ocean    | 94  | 10             | 0.777          | 0.834          | 0.069*          | 91-127                 |
|                           |               | R: ACAAACGCCACCTTCCAGT             |                     |                                 | Mediterranean Sea | 57  | 13             | 0.667          | 0.906          | 0.264*          |                        |
|                           | Mmer-EST_10.1 | F: 6-FAMGTCATCATCCTCATCCTC         | (AGT) <sub>6</sub>  | 58 - 1.6                        | Atlantic Ocean    | 97  | 10             | 0.423          | 0.590          | 0.284*          | 225-261                |
|                           |               | R: CTACCTCCTCGTAGAAACAC            |                     |                                 | Mediterranean Sea | 66  | 9              | 0.379          | 0.636          | 0.405*          |                        |
|                           | Mmer-EST_13.1 | F: HEXGCCCGCACAGTCACAGGT           | (AC) <sub>10</sub>  |                                 | Atlantic Ocean    | 101 | 10             | 0.713          | 0.776          | 0.082           | 190-210                |

|             |                      |                                           |                     |          |                   |     |    |       |       |        |         |
|-------------|----------------------|-------------------------------------------|---------------------|----------|-------------------|-----|----|-------|-------|--------|---------|
| Tetraplex 2 |                      | R: CAAATCCCATGACAAAGCCA                   |                     |          | Mediterranean Sea | 73  | 10 | 0.534 | 0.660 | 0.191* |         |
|             | <i>Mmer-EST_10.2</i> | F: <sup>6-FAM</sup> TACCCAAATGCCAGCAAATC  | (AC) <sub>8</sub>   |          | Atlantic Ocean    | 92  | 10 | 0.717 | 0.803 | 0.106  | 177-201 |
|             |                      | R: TTTAGGGATTACACGTCAGC                   |                     |          | Mediterranean Sea | 68  | 11 | 0.677 | 0.765 | 0.116  |         |
|             | <i>Mmer-EST_13.3</i> | F: <sup>HEX</sup> TGAAAGCGTTGGTGTGAAG     | (AAC) <sub>6</sub>  |          | Atlantic Ocean    | 97  | 9  | 0.804 | 0.826 | 0.026  | 126-159 |
|             |                      | R: CATTTGTTCATTCCCAGCTCA                  |                     |          | Mediterranean Sea | 70  | 11 | 0.643 | 0.804 | 0.200* |         |
|             | <i>Mmer-EST_9.1</i>  | F: <sup>6-FAM</sup> CTGGTCCCAAATAAATCCT   | (AC) <sub>6</sub>   | 55 - 1.8 | Atlantic Ocean    | 83  | 10 | 0.301 | 0.584 | 0.484* | 216-246 |
|             |                      | R: TTGAATGGTGCTACTTGATT                   |                     |          | Mediterranean Sea | 68  | 6  | 0.324 | 0.610 | 0.470* |         |
|             | <i>Mmer-EST_14.2</i> | F: <sup>HEX</sup> ATTCCCACTGTTCGGCTGT     | (AC) <sub>10</sub>  |          | Atlantic Ocean    | 84  | 18 | 0.571 | 0.891 | 0.358* | 162-184 |
|             |                      | R: GTTTGACTCGGAAACCATGC                   |                     |          | Mediterranean Sea | 56  | 12 | 0.500 | 0.881 | 0.432* |         |
|             | <i>Mmer-EST_1.3</i>  | F: <sup>6-FAM</sup> TCTCCGTGGTAGATGGCTCA  | (AAT) <sub>14</sub> |          | Atlantic Ocean    | 45  | 17 | 0.667 | 0.901 | 0.260* | 114-150 |
|             |                      | R: AAATTGCTGCCGACAAATAAGT                 |                     |          | Mediterranean Sea | 37  | 17 | 0.703 | 0.893 | 0.213* |         |
|             | <i>Mmer-EST_14.4</i> | F: <sup>HEX</sup> AGCAAGGAATGTAAACCGCA    | (AG) <sub>7</sub>   |          | Atlantic Ocean    | 82  | 28 | 0.598 | 0.903 | 0.338* | 78-122  |
|             |                      | R: GCGGGAGACAAGAGGTGTT                    |                     |          | Mediterranean Sea | 64  | 18 | 0.594 | 0.803 | 0.261* |         |
|             | <i>Mmer-EST_8.1</i>  | F: <sup>6-FAM</sup> CGTTGGTACACTTTGCTACTC | (AC) <sub>14</sub>  | 60 - 1.5 | Atlantic Ocean    | 36  | 15 | 0.806 | 0.887 | 0.092  | 198-226 |
| Tetraplex 3 |                      | R: GAGCCCTTCTCTTCCTCTG                    |                     |          | Mediterranean Sea | 25  | 9  | 0.640 | 0.823 | 0.222* |         |
|             | <i>Mmer-EST_8.2</i>  | F: <sup>HEX</sup> CAGCAACAAACGCAAACCTGA   | (AC) <sub>9</sub>   |          | Atlantic Ocean    | 40  | 11 | 0.600 | 0.859 | 0.302* | 150-174 |
|             |                      | R: GATGGTCGTTGGATCGTCTC                   |                     |          | Mediterranean Sea | 25  | 7  | 0.760 | 0.798 | 0.047  |         |
|             | <i>Mmer-EST_8.3</i>  | F: <sup>6-FAM</sup> CTCCTCCACTACCCACCTGA  | (ACG) <sub>6</sub>  |          | Atlantic Ocean    | 91  | 18 | 0.670 | 0.897 | 0.252* | 108-132 |
|             |                      | R: AACCATCATCTGCCACCATC                   |                     |          | Mediterranean Sea | 79  | 13 | 0.608 | 0.842 | 0.278* |         |
|             | <i>Mmer-EST_8.4</i>  | F: <sup>HEX</sup> CCATTTCGGTAAGTCAGTCGG   | (AAGT) <sub>7</sub> |          | Atlantic Ocean    | 98  | 34 | 0.796 | 0.952 | 0.164* | 60-110  |
|             |                      | R: TGAACATCGGTTAGGTCCACA                  |                     |          | Mediterranean Sea | 68  | 22 | 0.750 | 0.915 | 0.180* |         |
|             | <i>Mmer-EST_3.1</i>  | F: <sup>6-FAM</sup> CGCTATGCGTTATGGGAGAA  | (AT) <sub>6</sub>   | 60 - 1.5 | Atlantic Ocean    | 28  | 9  | 0.536 | 0.827 | 0.353* | 192-212 |
|             |                      | R: CCCAGAGGTTCAAATCCAAA                   |                     |          | Mediterranean Sea | 0   | 0  | NA    | NA    | NA     |         |
|             | <i>Mmer-EST_6.3</i>  | F: <sup>HEX</sup> TGTTGCCGCTGTCTAGCTTA    | (AGG) <sub>7</sub>  |          | Atlantic Ocean    | 110 | 33 | 0.909 | 0.935 | 0.028* | 122-170 |
| Tetraplex 4 |                      |                                           |                     |          |                   |     |    |       |       |        |         |
|             |                      |                                           |                     |          |                   |     |    |       |       |        |         |

|             |                     |                                            |                      |          |                   |     |    |       |       |        |         |
|-------------|---------------------|--------------------------------------------|----------------------|----------|-------------------|-----|----|-------|-------|--------|---------|
| Tetraplex 5 |                     | R: AGCATCAAAGAAGAAACCGTG                   |                      |          | Mediterranean Sea | 79  | 27 | 0.772 | 0.922 | 0.162* |         |
|             | <i>Mmer-EST_6.4</i> | F: <sup>6-FAM</sup> CTTTCCCTTTAGTTTGCCCG   | (CCG) <sub>6</sub>   |          | Atlantic Ocean    | 82  | 30 | 0.707 | 0.936 | 0.244* | 87-122  |
|             |                     | R: GACGACACGTTGTTCCGAC                     |                      |          | Mediterranean Sea | 72  | 24 | 0.736 | 0.835 | 0.119* |         |
|             | <i>Mmer-EST_9.4</i> | F: <sup>HEX</sup> TTGTAGCTGTATCTGCTTTAATGA | (ACAT) <sub>11</sub> |          | Atlantic Ocean    | 57  | 29 | 0.597 | 0.941 | 0.366* | 82-122  |
|             |                     | R: TGTTCAATGTGTTTCTGTAATCC                 |                      |          | Mediterranean Sea | 30  | 13 | 0.300 | 0.903 | 0.668* |         |
|             | <i>Mmer-EST_2.1</i> | F: <sup>6-FAM</sup> GACGGCAACCACAACGATA    | (CCG) <sub>8</sub>   | 59 - 1.5 | Atlantic Ocean    | 57  | 29 | 0.474 | 0.950 | 0.501* | 188-234 |
|             |                     | R: TGCACAACCACACCACAATA                    |                      |          | Mediterranean Sea | 19  | 10 | 0.474 | 0.882 | 0.463* |         |
|             | <i>Mmer-EST_2.2</i> | F: <sup>HEX</sup> CCCGAAACAACATTTCAGAG     | (AAT) <sub>6</sub>   |          | Atlantic Ocean    | 92  | 28 | 0.587 | 0.913 | 0.357* | 140-185 |
|             |                     | R: GTTTGGCTCAGAAGACCCCTG                   |                      |          | Mediterranean Sea | 71  | 18 | 0.352 | 0.929 | 0.621* |         |
|             | <i>Mmer-EST_4.3</i> | F: <sup>6-FAM</sup> GCGTCTCAGGATAAGTTGGG   | (AAC) <sub>10</sub>  |          | Atlantic Ocean    | 102 | 28 | 0.726 | 0.939 | 0.228* | 115-149 |
|             |                     | R: TTGACATTCAGGACAAGCAGA                   |                      |          | Mediterranean Sea | 79  | 22 | 0.722 | 0.932 | 0.226* |         |
|             | <i>Mmer-EST_2.4</i> | F: <sup>HEX</sup> CGATTACGAAGAGCAGTCA      | (AAC) <sub>6</sub>   |          | Atlantic Ocean    | 86  | 22 | 0.733 | 0.846 | 0.134* | 76-108  |
|             |                     | R: ACGACCTTTAGCCGGTCTGT                    |                      |          | Mediterranean Sea | 78  | 19 | 0.654 | 0.867 | 0.246* |         |

NOTE. F, forward sequence; R, reverse sequence; T (°C), annealing temperature; MgCl<sub>2</sub> [mM], MgCl<sub>2</sub> concentration; N, number of individuals genotyped per locus and population; N<sub>a</sub>, number of alleles per locus; H<sub>O</sub>, observed heterozygosity; H<sub>E</sub>, expected heterozygosity; F<sub>IS</sub>, intrapopulation fixation index [82]; NA, no amplification observed; \*  $p(F_{IS} = 0) \leq 0.01$ .

**Table S2.** Sequence similarity search for 26 microsatellite-containing sequences (5 random clones and 23 EST contigs) of *Merluccius merluccius*. Accession codes are given in the third column as GenBank for anonymous microsatellites and the European Nucleotide Archive for EST microsatellites. Microsatellite-containing sequences were compared against fish protein sequence databases available from the National Center for Biotechnology Information (NCBI, 22 May 2020). Accession No. of matched coding sequences are given in the tenth column. NPM, no protein match was found.

[illegible]

|                                                                                                    |      |      |     |       |     |                |
|----------------------------------------------------------------------------------------------------|------|------|-----|-------|-----|----------------|
| LOW QUALITY PROTEIN: cilia- and flagella-associated protein 44 [ <i>Electrophorus electricus</i> ] | 32.3 | 60.8 | 38% | 0.53  | 81% | XP_026863865.1 |
| LOW QUALITY PROTEIN: cilia- and flagella-associated protein 44 [ <i>Scleropages formosus</i> ]     | 32.0 | 60.1 | 35% | 1.2   | 87% | XP_029104418.1 |
| cilia- and flagella-associated protein 44 [ <i>Clupea harengus</i> ]                               | 33.5 | 59.3 | 36% | 2.0   | 88% | XP_031440333.1 |
| Hypothetical protein AMELA_G00222490 [ <i>Ameiurus melas</i> ]                                     | 32.3 | 58.9 | 36% | 2.9   | 81% | KAF4075757.1   |
| cilia- and flagella-associated protein 44 [ <i>Sphaeramia orbicularis</i> ]                        | 32.0 | 58.1 | 37% | 4.9   | 75% | XP_030005630.1 |
| cilia- and flagella-associated protein 44 [ <i>Parambassis ranga</i> ]                             | 32.7 | 57.8 | 37% | 6.0   | 68% | XP_028274026.1 |
| cilia- and flagella-associated protein 44 [ <i>Gadus morhua</i> ]                                  | 35.4 | 67.4 | 38% | 0.009 | 81% | XP_030204510.1 |
| Cilia- and flagella-associated protein 44 [ <i>Seriola dumerili</i> ]                              | 32.3 | 57.4 | 37% | 5.1   | 68% | XP_022600157.1 |
| Cilia- and flagella-associated protein 44 [ <i>Seriola lalandi dorsalis</i> ]                      | 32.3 | 57.4 | 37% | 5.1   | 68% | XP_023281359.1 |
| Cilia- and flagella-associated protein 44 [ <i>Monopterus albus</i> ]                              | 32.3 | 57.4 | 37% | 5.1   | 68% | XP_020456723.1 |
| cilia- and flagella-associated protein 44 isoform X1 [ <i>Oreochromis aureus</i> ]                 | 30.4 | 57.4 | 38% | 8.3   | 63% | XP_031601520.1 |
| cilia- and flagella-associated protein 44 isoform X2 [ <i>Oreochromis aureus</i> ]                 | 30.4 | 57.4 | 38% | 8.3   | 63% | XP_031601522.1 |
| cilia- and flagella-associated protein 44 isoform X1 [ <i>Pseudochaenichthys georgianus</i> ]      | 32.3 | 57.0 | 37% | 7.0   | 81% | XP_033952235.1 |
| cilia- and flagella-associated protein 44 isoform X1 [ <i>Trematomus bernacchii</i> ]              | 32.3 | 57.0 | 37% | 7.0   | 81% | XP_033981538.1 |

|                            |               |                 |                                                                                                |      |      |     |       |     |                |                                                                                                                                                                                                                                                |
|----------------------------|---------------|-----------------|------------------------------------------------------------------------------------------------|------|------|-----|-------|-----|----------------|------------------------------------------------------------------------------------------------------------------------------------------------------------------------------------------------------------------------------------------------|
|                            |               |                 | cilia- and flagella-associated protein 44 isoform X2 [ <i>Pseudochaenichthys georgianus</i> ]  | 32.3 | 57.0 | 37% | 7.0   | 81% | XP_033952236.1 |                                                                                                                                                                                                                                                |
|                            |               |                 | cilia- and flagella-associated protein 44 isoform X2 [ <i>Trematomus bernacchii</i> ]          | 32.3 | 57.0 | 37% | 7.0   | 81% | XP_033981539.1 |                                                                                                                                                                                                                                                |
|                            |               |                 | LOW QUALITY PROTEIN: cilia- and flagella-associated protein 44 [ <i>Gymnodraco acuticeps</i> ] | 32.3 | 57.0 | 37% | 7.0   | 81% | XP_034066690.1 |                                                                                                                                                                                                                                                |
|                            |               |                 | PREDICTED: cilia- and flagella-associated protein 44 [ <i>Notothenia coriiceps</i> ]           | 32.3 | 56.6 | 37% | 7.9   | 81% | XP_010790959.1 |                                                                                                                                                                                                                                                |
|                            |               |                 | Cilia- and flagella-associated protein 44 [ <i>Danio rerio</i> ]                               | 29.3 | 29.3 | 17% | 3.0   | 85% | XP_017209920.2 |                                                                                                                                                                                                                                                |
| <b>EST-microsatellites</b> |               |                 |                                                                                                |      |      |     |       |     |                |                                                                                                                                                                                                                                                |
| Triplex 2                  | Mmer-EST_1.1  | ERR048980.48818 | NPM                                                                                            |      |      |     |       |     |                | GAGGCGCCGTGTCGTAAACTCGCGTCACCCGTACAGCCGCCAACGCCGCTGAGGAGCCGCCAACGCCGCTGAGGAGACGCCATCACTCAGCTTCCGCTCCTCACGATGCAGTAGCCAATCAGGCGATAGGACCGCACCGCTGTAGCCAATCATGTTTCTTCTTCTTCTTCTTCTTCTTCTTCTTCTGCTCGGGCGCCGCGGCCAGACCTCCCGCGCCGCTTTATGCAACGCTGTGTTG |
|                            | Mmer-EST_11.2 | ERR048979.15436 | NPM                                                                                            |      |      |     |       |     |                | GTCATGTACACTACAGGATACAGGGAGTAACCGTGTTACTCAGACTGTGTGTGTGTGTGTGTTTACACGTCTGGCCGTCTGGCTGACCTGGTGGACGAGGGGTTAACTGCTCCTAGTGTATTTATTAAAGAACACGTAATGCAGATAATGCAGATAATGCAGATTGGCGTTTGGCTGCGGTGCGGATGTATTGCGGTGGAGTGGAGACG                              |
|                            | Mmer-EST_11.4 | ERR048976.13483 | PR domain zinc finger protein 2-like [ <i>Gadus morhua</i> ]                                   | 43.9 | 43.9 | 94% | 0.006 | 44% | XP_030211173.1 | TAGGCCGAGGTTCTCTCCGAGATGTTGCTGGAGACGTCAGCATGTAGTGCTGCTCGGCGCGTTCTGCAGGACCGTCTGCAGGAGCCGCACAGCCAGGCAGCGTTCTGGTTGAGAGGTCATGCCGGCCGCTCCGCCGCCGCCGCCGCCGCTCGCCTGGAGCGGTGGCGTCCGGTCGGCCTGCTCGACTGGAAGGTGGCGTTGTGAACCCGGGCGCTCGTGCCG                 |
|                            |               |                 | PR domain zinc finger protein 2-like [ <i>Scleropages formosus</i> ]                           | 37.7 | 37.7 | 94% | 1.1   | 37% | XP_018592109.2 |                                                                                                                                                                                                                                                |

|             |                   |                 |                                                                                                      |      |      |     |              |     |                |                                                                                                                                                                                                                                                                           |
|-------------|-------------------|-----------------|------------------------------------------------------------------------------------------------------|------|------|-----|--------------|-----|----------------|---------------------------------------------------------------------------------------------------------------------------------------------------------------------------------------------------------------------------------------------------------------------------|
|             |                   |                 | PR domain zinc finger protein 2-like<br>[ <i>Scleropages formosus</i> ]                              | 37.7 | 37.7 | 94% | 1.1          | 37% | KPP72719.1     |                                                                                                                                                                                                                                                                           |
|             |                   |                 | PR domain zinc finger protein 2-like<br>[ <i>Anabas testudineus</i> ]                                | 35.8 | 35.8 | 94% | 4.7          | 45% | XP_026224024.1 |                                                                                                                                                                                                                                                                           |
|             |                   |                 | PR domain zinc finger protein 2 isoform X2<br>[ <i>Larimichthys crocea</i> ]                         | 35.0 | 35.0 | 94% | 7.7          | 41% | XP_019115632.2 |                                                                                                                                                                                                                                                                           |
|             |                   |                 | PR domain zinc finger protein 2 isoform X1<br>[ <i>Larimichthys crocea</i> ]                         | 35.0 | 35.0 | 94% | 7.7          | 41% | XP_010730713.3 |                                                                                                                                                                                                                                                                           |
| Tetraplex 1 | Mmer-<br>EST_10.1 | ERR048980.25012 | transmembrane emp24 domain-containing<br>protein 3-like [ <i>Oncorhynchus nerka</i> ]                | 50.8 | 50.8 | 29% | 3.00E-<br>07 | 92% | XP_029507984.1 | GTCATCATCCTCATCCTCAGTAGTAGTAGTAGTAC<br>TATCATCTGGGTCTGTACCCATCCTCCTCATCCTCACT<br>GCCGTGTGGTCCGGTCCCTCCTGACCATGCGTAGCCTG<br>GGGTTTAGCTGCGTCCCGGTCCCGGTCTGGTCTGGTC<br>CTGCATGTGGTCTGGTGGGGAGCACGGAGCTCACGTT<br>TGAGCTGCCCGACAATGATAAGCAGTGTCTTCTACGAGG<br>AGGTAGAAAACGGTGTG |
|             |                   |                 | transmembrane emp24 domain-containing<br>protein 3-like [ <i>Salmo trutta</i> ]                      | 51.6 | 51.6 | 29% | 4.00E-<br>07 | 92% | XP_029600861.1 |                                                                                                                                                                                                                                                                           |
|             |                   |                 | transmembrane emp24 domain-containing<br>protein 3-like [ <i>Oncorhynchus tshawytscha</i> ]          | 51.6 | 51.6 | 29% | 4.00E-<br>07 | 92% | XP_024264943.1 |                                                                                                                                                                                                                                                                           |
|             |                   |                 | transmembrane emp24 domain-containing<br>protein 3-like [ <i>Gadus morhua</i> ]                      | 51.2 | 51.2 | 29% | 5.00E-<br>07 | 88% | XP_030232043.1 |                                                                                                                                                                                                                                                                           |
|             |                   |                 | transmembrane emp24 domain-containing<br>protein 3-like [ <i>Myripristis murdjan</i> ]               | 50.8 | 50.8 | 29% | 9.00E-<br>07 | 88% | XP_029935681.1 |                                                                                                                                                                                                                                                                           |
|             |                   |                 | transmembrane emp24 domain-containing<br>protein 3-like [ <i>Sphaeramia orbicularis</i> ]            | 48.9 | 48.9 | 27% | 4.00E-<br>06 | 91% | XP_029983726.1 |                                                                                                                                                                                                                                                                           |
|             |                   |                 | transmembrane emp24 domain-containing<br>protein 3-like [ <i>Denticeps clupeoides</i> ]              | 47.0 | 47.0 | 27% | 2.00E-<br>05 | 87% | XP_028824730.1 |                                                                                                                                                                                                                                                                           |
|             |                   |                 | transmembrane emp24 domain-containing<br>protein 3-like [ <i>Boleophthalmus<br/>pectinirostris</i> ] | 47.0 | 47.0 | 27% | 2.00E-<br>05 | 87% | XP_020797312.1 |                                                                                                                                                                                                                                                                           |
|             |                   |                 | transmembrane emp24 domain-containing<br>protein 3-like [ <i>Etheostoma spectabile</i> ]             | 46.6 | 46.6 | 27% | 3.00E-<br>05 | 87% | XP_032374488.1 |                                                                                                                                                                                                                                                                           |
|             |                   |                 | transmembrane emp24 domain-containing<br>protein 3-like [ <i>Perca flavescens</i> ]                  | 46.2 | 46.2 | 27% | 3.00E-<br>05 | 87% | XP_028437200.1 |                                                                                                                                                                                                                                                                           |



|                                                                                               |      |      |     |          |     |                |
|-----------------------------------------------------------------------------------------------|------|------|-----|----------|-----|----------------|
| transmembrane emp24 domain-containing protein 3-like [ <i>Sander lucioperca</i> ]             | 46.2 | 46.2 | 27% | 4.00E-05 | 87% | XP_031169891.1 |
| transmembrane emp24 domain-containing protein 3-like [ <i>Carassius auratus</i> ]             | 46.2 | 46.2 | 29% | 4.00E-05 | 79% | XP_026123094.1 |
| transmembrane emp24 domain-containing protein 3-like [ <i>Monopterus albus</i> ]              | 46.2 | 46.2 | 27% | 4.00E-05 | 87% | XP_020475580.1 |
| transmembrane emp24 domain-containing protein 3-like [ <i>Trematomus bernacchii</i> ]         | 46.2 | 46.2 | 27% | 4.00E-05 | 87% | XP_033972434.1 |
| transmembrane emp24 domain-containing protein 3-like [ <i>Electrophorus electricus</i> ]      | 46.2 | 46.2 | 30% | 3.00E-05 | 76% | XP_026853677.1 |
| transmembrane emp24 domain-containing protein 3-like [ <i>Chanos chanos</i> ]                 | 45.8 | 45.8 | 27% | 6.00E-05 | 83% | XP_030622302.1 |
| transmembrane emp24 domain-containing protein 3-like [ <i>Parambassis ranga</i> ]             | 45.4 | 45.4 | 30% | 6.00E-05 | 76% | XP_028258374.1 |
| transmembrane emp24 domain-containing protein 3-like [ <i>Periophthalmus magnuspinnatus</i> ] | 45.1 | 45.1 | 27% | 1.00E-04 | 83% | XP_033846938.1 |
| transmembrane emp24 domain-containing protein 3-like isoform X1 [ <i>Seriola dumerili</i> ]   | 45.1 | 45.1 | 27% | 1.00E-04 | 83% | XP_022595865.1 |
| transmembrane emp24 domain-containing protein 3-like [ <i>Amphiprion ocellaris</i> ]          | 45.1 | 45.1 | 27% | 1.00E-04 | 83% | XP_023153366.1 |
| transmembrane emp24 domain-containing protein 3-like [ <i>Mastacembelus armatus</i> ]         | 44.7 | 44.7 | 27% | 1.00E-04 | 83% | XP_026149183.1 |
| transmembrane emp24 domain-containing protein 3-like [ <i>Archocentrus centrarchus</i> ]      | 44.7 | 44.7 | 26% | 2.00E-04 | 86% | XP_030580514.1 |
| transmembrane emp24 domain-containing protein 3-like [ <i>Clupea harengus</i> ]               | 44.7 | 44.7 | 27% | 2.00E-04 | 78% | XP_012697816.2 |
| transmembrane emp24 domain-containing protein 3-like [ <i>Tachysurus fulvidraco</i> ]         | 44.7 | 44.7 | 27% | 2.00E-04 | 78% | XP_027008813.1 |
| transmembrane emp24 domain-containing protein 3-like [ <i>Echeneis naucrates</i> ]            | 44.3 | 44.3 | 27% | 2.00E-04 | 83% | XP_029355001.1 |

|                                                                                          |      |      |     |          |     |                |
|------------------------------------------------------------------------------------------|------|------|-----|----------|-----|----------------|
| transmembrane emp24 domain-containing protein 3-like [ <i>Takifugu rubripes</i> ]        | 44.3 | 44.3 | 27% | 2.00E-04 | 74% | XP_003969553.1 |
| transmembrane emp24 domain-containing protein 3-like [ <i>Sparus aurata</i> ]            | 43.9 | 43.9 | 27% | 3.00E-04 | 78% | XP_030269428.1 |
| transmembrane emp24 domain-containing protein 3-like [ <i>Xiphophorus maculatus</i> ]    | 43.9 | 43.9 | 27% | 3.00E-04 | 83% | XP_005796202.1 |
| transmembrane emp24 domain-containing protein 3-like [ <i>Betta splendens</i> ]          | 43.5 | 43.5 | 27% | 4.00E-04 | 83% | XP_029000228.1 |
| transmembrane emp24 domain-containing protein 3-like [ <i>Paramormyrops kingsleyae</i> ] | 43.1 | 43.1 | 29% | 5.00E-04 | 75% | XP_023697741.1 |
| transmembrane emp24 domain-containing protein 3-like [ <i>Seriola lalandi dorsalis</i> ] | 43.1 | 43.1 | 27% | 5.00E-04 | 78% | XP_023267753.1 |
| transmembrane emp24 domain-containing protein 3-like [ <i>Scleropages formosus</i> ]     | 42.7 | 42.7 | 27% | 8.00E-04 | 74% | XP_018619294.2 |
| transmembrane emp24 domain-containing protein 3-like [ <i>Oryzias melastigma</i> ]       | 42.7 | 42.7 | 29% | 8.00E-04 | 75% | XP_024151815.1 |
| transmembrane emp24 domain-containing protein 3 precursor [ <i>Salmo salar</i> ]         | 51.6 | 51.6 | 29% | 4.00E-07 | 92% | NP_001139866.1 |
| transmembrane emp24 domain-containing protein 3 precursor [ <i>Oncorhynchus mykiss</i> ] | 51.6 | 51.6 | 29% | 4.00E-07 | 92% | ACO08423.1     |
| transmembrane emp24 domain-containing protein 3 precursor [ <i>Esox lucius</i> ]         | 50.8 | 50.8 | 29% | 7.00E-07 | 92% | NP_001297835.1 |
| transmembrane emp24 domain-containing protein 3 precursor [ <i>Danio rerio</i> ]         | 47.8 | 47.8 | 30% | 1.00E-05 | 80% | NP_001122140.1 |
| transmembrane emp24 domain-containing protein 3 precursor [ <i>Osmerus mordax</i> ]      | 47.4 | 47.4 | 29% | 1.00E-05 | 88% | ACO09604.1     |
| transmembrane emp24 domain-containing protein 3 [ <i>Pangasianodon hypophthalmus</i> ]   | 47.0 | 47.0 | 27% | 2.00E-05 | 87% | XP_034164308.1 |
| transmembrane emp24 domain-containing protein 3 [ <i>Larimichthys crocea</i> ]           | 46.2 | 46.2 | 27% | 4.00E-05 | 87% | XP_010753799.1 |
| transmembrane emp24 domain-containing protein 3 [ <i>Epinephelus lanceolatus</i> ]       | 45.8 | 45.8 | 27% | 5.00E-05 | 87% | XP_033483227.1 |

|                                                                                                         |      |      |     |          |     |                |
|---------------------------------------------------------------------------------------------------------|------|------|-----|----------|-----|----------------|
| transmembrane emp24 domain-containing protein 3 [ <i>Asyanax mexicanus</i> ]                            | 45.8 | 45.8 | 27% | 6.00E-05 | 83% | XP_022525710.1 |
| transmembrane emp24 domain-containing protein 3 [ <i>Fundulus heteroclitus</i> ]                        | 45.4 | 45.4 | 29% | 6.00E-05 | 79% | XP_012724201.1 |
| transmembrane emp24 domain-containing protein 3 [ <i>Oreochromis niloticus</i> ]                        | 45.8 | 45.8 | 27% | 6.00E-05 | 83% | XP_003437677.1 |
| transmembrane emp24 domain-containing protein 3 [ <i>Gymnodraco acuticeps</i> ]                         | 45.4 | 45.4 | 27% | 7.00E-05 | 87% | XP_034052550.1 |
| transmembrane emp24 domain-containing protein 3 [ <i>Maylandia zebra</i> ]                              | 45.4 | 45.4 | 27% | 8.00E-05 | 83% | XP_004539647.1 |
| transmembrane emp24 domain-containing protein 3 [ <i>Oryzias latipes</i> ]                              | 45.1 | 45.1 | 29% | 9.00E-05 | 79% | XP_023809353.1 |
| transmembrane emp24 domain-containing protein 3 isoform X2 [ <i>Cottoperca gobio</i> ]                  | 44.3 | 44.3 | 27% | 2.00E-04 | 83% | XP_029313050.1 |
| transmembrane emp24 domain-containing protein 3 [ <i>Pseudochaenichthys georgianus</i> ]                | 44.3 | 44.3 | 27% | 2.00E-04 | 78% | XP_033932429.1 |
| transmembrane emp24 domain-containing protein 3 [ <i>Bagarius yarrelli</i> ]                            | 43.1 | 43.1 | 27% | 6.00E-04 | 74% | TSL68231.1     |
| transmembrane emp24 domain-containing protein 3 [ <i>Cyclopterus lumpus</i> ]                           | 40.0 | 40.0 | 27% | 0.006    | 74% | XP_034414487.1 |
| transmembrane emp24 domain-containing protein 3 [ <i>Liparis tanakae</i> ]                              | 39.3 | 39.3 | 27% | 0.011    | 74% | TNN50236.1     |
| Isocitrate dehydrogenase (NADP), mitochondrial-like isoform X2 [ <i>Trematomus bernacchii</i> ]         | 48.5 | 48.5 | 27% | 9.00E-06 | 87% | XP_033972435.1 |
| Isocitrate dehydrogenase (NADP), mitochondrial-like isoform X2 [ <i>Periophthalmus magnuspinnatus</i> ] | 47.4 | 47.4 | 27% | 2.00E-05 | 83% | XP_033846944.1 |
| Isocitrate dehydrogenase (NADP), mitochondrial-like [ <i>Paramormyrops kingsleyae</i> ]                 | 47.0 | 47.0 | 27% | 3.00E-05 | 78% | XP_023671162.1 |

|                                                                                            |      |      |     |          |     |                |
|--------------------------------------------------------------------------------------------|------|------|-----|----------|-----|----------------|
| Isocitrate dehydrogenase (NADP), mitochondrial-like isoform X2 [ <i>Seriola dumerili</i> ] | 47.0 | 47.0 | 27% | 3.00E-05 | 83% | XP_022595872.1 |
| Isocitrate dehydrogenase (NADP), mitochondrial isoform X3 [ <i>Cottoperca gobio</i> ]      | 46.2 | 46.2 | 27% | 5.00E-05 | 83% | XP_029313062.1 |
| Isocitrate dehydrogenase (NADP), mitochondrial-like [ <i>Acanthochromis polyacanthus</i> ] | 45.8 | 45.8 | 27% | 7.00E-05 | 78% | XP_022055226.1 |
| Isocitrate dehydrogenase (NADP), mitochondrial [ <i>Channa argus</i> ]                     | 45.8 | 45.8 | 27% | 7.00E-05 | 87% | KAF3686802.1   |
| Isocitrate dehydrogenase (NADP), mitochondrial-like [ <i>Kryptolebias marmoratus</i> ]     | 44.7 | 44.7 | 27% | 2.00E-04 | 74% | XP_017274110.2 |
| Isocitrate dehydrogenase (NADP), mitochondrial-like [ <i>Labrus bergylta</i> ]             | 42.4 | 42.4 | 27% | 0.001    | 78% | XP_020510597.1 |
| Isocitrate dehydrogenase (NADP), mitochondrial-like [ <i>Gouania willdenowi</i> ]          | 40.4 | 40.4 | 27% | 0.005    | 78% | XP_028329632.1 |
| transmembrane emp24 domain-containing protein 7-like [ <i>Electrophorus electricus</i> ]   | 40.8 | 40.8 | 26% | 0.004    | 73% | XP_026855530.1 |
| transmembrane emp24 domain-containing protein 7-like [ <i>Salarias fasciatus</i> ]         | 40.4 | 40.4 | 27% | 0.005    | 74% | XP_029961128.1 |
| transmembrane emp24 domain-containing protein 7-like [ <i>Carassius auratus</i> ]          | 40.4 | 40.4 | 27% | 0.005    | 70% | XP_026072871.1 |
| transmembrane emp24 domain-containing protein 7-like [ <i>Denticeps clupeoides</i> ]       | 40.4 | 40.4 | 29% | 0.005    | 71% | XP_028852684.1 |
| transmembrane emp24 domain-containing protein 7-like [ <i>Gouania willdenowi</i> ]         | 40.4 | 40.4 | 26% | 0.006    | 77% | XP_028312234.1 |
| transmembrane emp24 domain-containing protein 7-like [ <i>Betta splendens</i> ]            | 40.0 | 40.0 | 27% | 0.006    | 74% | XP_029017970.1 |
| transmembrane emp24 domain-containing protein 7-like [ <i>Xiphophorus maculatus</i> ]      | 40.0 | 40.0 | 26% | 0.007    | 73% | XP_005794935.1 |

|                                                                                               |      |      |     |       |     |                |
|-----------------------------------------------------------------------------------------------|------|------|-----|-------|-----|----------------|
| transmembrane emp24 domain-containing protein 7-like [ <i>Clupea harengus</i> ]               | 39.7 | 39.7 | 27% | 0.009 | 70% | XP_012691396.1 |
| transmembrane emp24 domain-containing protein 7-like [ <i>Xiphophorus couchianus</i> ]        | 39.7 | 39.7 | 26% | 0.009 | 73% | XP_027890072.1 |
| transmembrane emp24 domain-containing protein 7-like [ <i>Boleophthalmus pectinirostris</i> ] | 39.7 | 39.7 | 26% | 0.009 | 73% | XP_020776251.1 |
| transmembrane emp24 domain-containing protein 7-like [ <i>Salmo trutta</i> ]                  | 39.7 | 39.7 | 26% | 0.009 | 73% | XP_029617957.1 |
| transmembrane emp24 domain-containing protein 7-like [ <i>Oncorhynchus kisutch</i> ]          | 39.7 | 39.7 | 26% | 0.009 | 73% | XP_020345026.1 |
| transmembrane emp24 domain-containing protein 7-like [ <i>Oncorhynchus mykiss</i> ]           | 39.7 | 39.7 | 26% | 0.010 | 73% | XP_021460916.1 |
| transmembrane emp24 domain-containing protein 7-like [ <i>Oncorhynchus nerka</i> ]            | 39.7 | 39.7 | 26% | 0.010 | 73% | XP_029493005.1 |
| transmembrane emp24 domain-containing protein 7-like [ <i>Echeines naucrates</i> ]            | 39.7 | 39.7 | 26% | 0.010 | 73% | XP_029366955.1 |
| transmembrane emp24 domain-containing protein 7-like isoform X2 [ <i>Labrus bergylta</i> ]    | 39.7 | 39.7 | 26% | 0.011 | 73% | XP_020499123.1 |
| transmembrane emp24 domain-containing protein 7-like isoform X1 [ <i>Labrus bergylta</i> ]    | 39.7 | 39.7 | 26% | 0.011 | 73% | XP_020499122.1 |
| transmembrane emp24 domain-containing protein 7-like isoform X2 [ <i>Sparus aurata</i> ]      | 39.3 | 39.3 | 26% | 0.012 | 77% | XP_030272512.1 |
| transmembrane emp24 domain-containing protein 7-like [ <i>Monopterus albus</i> ]              | 39.3 | 39.3 | 26% | 0.012 | 73% | XP_020458067.1 |
| transmembrane emp24 domain-containing protein 7-like isoform X2 [ <i>Gadus morhua</i> ]       | 39.3 | 39.3 | 26% | 0.015 | 73% | XP_030214769.1 |
| transmembrane emp24 domain-containing protein 7-like [ <i>Scleropages formosus</i> ]          | 39.3 | 39.3 | 26% | 0.015 | 73% | KPP64488.1     |
| transmembrane emp24 domain-containing protein 7-like [ <i>Oryzias melastigma</i> ]            | 38.9 | 38.9 | 26% | 0.016 | 73% | XP_024131620.1 |

|                                                                                          |      |      |     |       |     |                |
|------------------------------------------------------------------------------------------|------|------|-----|-------|-----|----------------|
| transmembrane emp24 domain-containing protein 7-like [ <i>Kryptolebias marmoratus</i> ]  | 38.9 | 38.9 | 26% | 0.017 | 73% | XP_017269375.1 |
| transmembrane emp24 domain-containing protein 7-like [ <i>Cottoperca gobio</i> ]         | 38.9 | 38.9 | 26% | 0.017 | 73% | XP_029296333.1 |
| transmembrane emp24 domain-containing protein 7-like [ <i>Myripristis murdjan</i> ]      | 38.9 | 38.9 | 26% | 0.017 | 73% | XP_029916728.1 |
| transmembrane emp24 domain-containing protein 7-like [ <i>Perca flavescens</i> ]         | 38.9 | 38.9 | 26% | 0.017 | 73% | XP_028433080.1 |
| transmembrane emp24 domain-containing protein 7-like [ <i>Archocentrus centrarchus</i> ] | 38.9 | 38.9 | 26% | 0.017 | 73% | XP_030593397.1 |
| transmembrane emp24 domain-containing protein 7-like [ <i>Parambassis ranga</i> ]        | 38.9 | 38.9 | 26% | 0.018 | 73% | XP_028270940.1 |
| transmembrane emp24 domain-containing protein 7-like [ <i>Mastacembelus armatus</i> ]    | 38.9 | 38.9 | 26% | 0.018 | 73% | XP_026178167.1 |
| transmembrane emp24 domain-containing protein 7-like [ <i>Anarrhichthys ocellatus</i> ]  | 38.9 | 38.9 | 26% | 0.018 | 73% | XP_031712030.1 |
| transmembrane emp24 domain-containing protein 7-like [ <i>Sphaeramia orbicularis</i> ]   | 38.9 | 38.9 | 26% | 0.019 | 73% | XP_029999321.1 |
| transmembrane emp24 domain-containing protein 7-like [ <i>Takifugu rubripes</i> ]        | 38.9 | 38.9 | 26% | 0.019 | 73% | XP_003974884.1 |
| transmembrane emp24 domain-containing protein 7-like [ <i>Seriola dumerili</i> ]         | 38.9 | 38.9 | 26% | 0.019 | 73% | XP_022613501.1 |
| transmembrane emp24 domain-containing protein 7-like [ <i>Cynoglossus semilaevis</i> ]   | 38.9 | 38.9 | 26% | 0.020 | 73% | XP_008335949.1 |
| transmembrane emp24 domain-containing protein 7-like [ <i>Chanos chanos</i> ]            | 38.5 | 38.5 | 26% | 0.022 | 73% | XP_030631937.1 |
| transmembrane emp24 domain-containing protein 7-like [ <i>Tachysurus fulvidraco</i> ]    | 35.4 | 35.4 | 26% | 0.280 | 68% | XP_027022590.1 |
| transmembrane emp24 domain-containing protein 7 precursor [ <i>Danio rerio</i> ]         | 40.4 | 40.4 | 29% | 0.005 | 67% | NP_001300637.1 |
| transmembrane emp24 domain-containing protein 7 precursor [ <i>Oncorhynchus mykiss</i> ] | 39.7 | 39.7 | 26% | 0.010 | 73% | ACO08146.1     |

|                                                                                               |      |      |     |       |     |                |
|-----------------------------------------------------------------------------------------------|------|------|-----|-------|-----|----------------|
| transmembrane emp24 domain-containing protein 7 precursor [ <i>Esox lucius</i> ]              | 39.3 | 39.3 | 26% | 0.012 | 73% | NP_001290769.1 |
| transmembrane emp24 domain-containing protein 7 [ <i>Anabailius grahami</i> ]                 | 41.2 | 41.2 | 77% | 0.003 | 38% | ROL53726.1     |
| transmembrane emp24 domain-containing protein 7-like isoform X1 [ <i>Anabas testudineus</i> ] | 40.8 | 40.8 | 27% | 0.004 | 74% | XP_026199701.1 |
| transmembrane emp24 domain-containing protein 7-like isoform X2 [ <i>Anabas testudineus</i> ] | 40.4 | 40.4 | 27% | 0.005 | 74% | XP_026199702.1 |
| transmembrane emp24 domain-containing protein 7-like [ <i>Pangasianodon hypophthalmus</i> ]   | 39.7 | 39.7 | 26% | 0.008 | 73% | XP_026781058.1 |
| transmembrane emp24 domain-containing protein 7 [ <i>Oryzias latipes</i> ]                    | 39.7 | 39.7 | 26% | 0.009 | 73% | XP_004072289.1 |
| transmembrane emp24 domain-containing protein 7 [ <i>Salvelinus alpinus</i> ]                 | 39.7 | 39.7 | 26% | 0.009 | 73% | XP_023834706.1 |
| transmembrane emp24 domain-containing protein 7 [ <i>Cyclopterus lumpus</i> ]                 | 39.7 | 39.7 | 26% | 0.009 | 73% | XP_034396819.1 |
| transmembrane emp24 domain-containing protein 7 [ <i>Liparis tanakae</i> ]                    | 39.7 | 39.7 | 26% | 0.010 | 73% | TNN55930.1     |
| transmembrane emp24 domain-containing protein 7 [ <i>Pseudochaenichthys georgianus</i> ]      | 39.7 | 39.7 | 26% | 0.010 | 73% | XP_033947282.1 |
| transmembrane emp24 domain-containing protein 7 [ <i>Astyanax mexicanus</i> ]                 | 39.3 | 39.3 | 26% | 0.011 | 73% | XP_007260848.1 |
| transmembrane emp24 domain-containing protein 7 isoform X1 [ <i>Maylandia zebra</i> ]         | 39.7 | 39.7 | 26% | 0.011 | 73% | XP_004547316.1 |
| transmembrane emp24 domain-containing protein 7 [ <i>Larimichthys crocea</i> ]                | 39.3 | 39.3 | 26% | 0.013 | 73% | XP_010746796.1 |
| transmembrane emp24 domain-containing protein 7 isoform X2 [ <i>Maylandia zebra</i> ]         | 39.3 | 39.3 | 26% | 0.014 | 73% | XP_004547317.1 |
| transmembrane emp24 domain-containing protein 7 [ <i>Oreochromis niloticus</i> ]              | 39.3 | 39.3 | 26% | 0.014 | 73% | XP_003446109.1 |

[illegible]



|             |                           |                 |                                                                   |      |      |     |          |     |                |                                                                                                                                                                                                                                                                                                 |
|-------------|---------------------------|-----------------|-------------------------------------------------------------------|------|------|-----|----------|-----|----------------|-------------------------------------------------------------------------------------------------------------------------------------------------------------------------------------------------------------------------------------------------------------------------------------------------|
|             |                           |                 |                                                                   |      |      |     |          |     |                | TTATTTTTTTTTCGCGCATGTAAATAGCGCACTGGCTGCT<br>CCATAGGGTGGAGGTGGACAA                                                                                                                                                                                                                               |
| Tetraplex 2 | Mmer-EST_9.1              | ERR048978.69936 | Hypothetical protein [ <i>Anguilla anguilla</i> ]                 | 37.0 | 37.0 | 45% | 0.005    | 56% | JAH98183.1     | CCCCTGGTCCCAAATAAATCCTGGTTTAAAGTTGAGAAC<br>CCTTCCCCTTTGTAAACAAGCTGCGTTCTCGCCACCTC<br>CTCACTCACACACACAAACATTTGGAAGCTTAAGGA<br>CATATATCCAAGACATCTATATAAACTCTAGATGTGCA<br>ATAAAATAACTTTTGTAAAACTTGATGGGCACATACGT<br>ACAAAGGGCCTACACATTAATCAAGTAGCACCATTCA<br>ATCCTAAATTCAACACTGTCAGTGC             |
|             | Mmer-EST_14.2             | ERR048980.18528 | Ubiquitin specific peptidase 40 [ <i>Nothobranchius furzeri</i> ] | 31.6 | 31.6 | 19% | 2.8      | 65% | SBS45312.1     | GGGGGGAGGGAGGAAGAGGAATAGAAAGCGTGATACT<br>TTTTAATTCCCACGTGTCGGCTGGAACCGCGACCTCGT<br>CTCCTCCGCCGACGCCGCTATACCGTGACACGCGCGT<br><b>GTGTGTGTGTGTGTGTGT</b> TTCTGTACAGTTACAGCGTA<br>GCACCAGAAGCTGTAGGGTGGGCTTTTCGCTCTCGTCCA<br>TCTTGCATGGTTTCCGAGTCAAACGGGGGGTGAGTCAC<br>GCCAGAATGGTGTGTGACTCACTTGGTG |
|             | Mmer-EST_1.3              | ERR048979.2798  | NPM                                                               |      |      |     |          |     |                | GGGGGGCGACGCGCGCCCGCTTATTTGATCTCCGTGGT<br>AGATGGCTCATCTAATGCATTCTTTGTGTTGAATCAGT<br>CGGCTCCATTAATAATAATAATAATAATAATAATA<br><b>ATAATAATAATAAT</b> GTATGCTATATTTAACTTATTTGTC<br>GGCAGCAATTTAAAAACGCCAGCAGTCGA                                                                                     |
|             | Mmer-EST_14.4             | ERR048980.28127 | NPM                                                               |      |      |     |          |     |                | CTGCGCACCGCGTTTCGCCAGGACGGCACCGGTGTAC<br>ATCTGGTTAGACGAGTCCTGCAAGCAGAACTACAAAAC<br>GGCAAACAGAGCTGTCAACGCAGCCGGAGAGGAGGAG<br>GAGGAAGTGGGAATGCAACAGCAAGGAATGTAAACCG<br>CACTTAAGAGCTTTGAACTGGGGTG <b>AGAGAGAGAGA</b><br><b>GAAGGAATGAGGAAGAAGTAATGTTA</b> ACCGGCAACAC<br>CTCTGTCTCCCGCTGTCTCTCG    |
| Tetraplex 3 | Mmer-EST_8.1 <sup>†</sup> | ERR048977.3541  | MTSS1-like protein [ <i>Channa argus</i> ]                        | 61.2 | 61.2 | 51% | 2.00E-10 | 79% | KAF3689057.1   | CGTTGGTACACTTTGCTACTCAGCTAGTCAGG <b>ACACAC</b><br><b>ACACACACACACACACACACT</b> TGCTCGTGACGCA<br>CGCAGCAGTGGCAGCGGTCTAGCCAAGGATCCTGGGCG<br>CCGAGCGGTCTGTCGGTCGCCACCTTGCGGAGCCTCACG<br>CCACGCCGATGGACACCAGCAGTCCACTTCTCTCTG<br>GCAGAGGAAGAGAAGGGCTCCGTGGGGGAAGGACGCG<br>G                         |
|             |                           |                 | MTSS1-like protein isoform X3 [ <i>Perca flavescens</i> ]         | 57.0 | 57.0 | 51% | 6.00E-09 | 74% | XP_028440813.1 |                                                                                                                                                                                                                                                                                                 |
|             |                           |                 | MTSS1-like protein isoform X2 [ <i>Parambassis ranga</i> ]        | 56.6 | 56.6 | 48% | 9.00E-09 | 73% | XP_028264257.1 |                                                                                                                                                                                                                                                                                                 |

|                                                                        |      |      |     |          |     |                |
|------------------------------------------------------------------------|------|------|-----|----------|-----|----------------|
| MTSS1-like protein [ <i>Larimichthys crocea</i> ]                      | 54.3 | 54.3 | 52% | 1.00E-08 | 70% | TMS05842.1     |
| MTSS1-like protein isoform X1 [ <i>Fundulus heteroclitus</i> ]         | 54.3 | 54.3 | 51% | 6.00E-08 | 74% | XP_012715788.1 |
| MTSS1-like protein isoform X1 [ <i>Oncorhynchus tshawytscha</i> ]      | 54.3 | 54.3 | 47% | 6.00E-08 | 75% | XP_024235587.1 |
| MTSS1-like protein isoform X1 [ <i>Oreochromis niloticus</i> ]         | 54.3 | 54.3 | 44% | 6.00E-08 | 76% | XP_003447182.1 |
| MTSS1-like protein isoform X3 [ <i>Oryzias latipes</i> ]               | 53.1 | 53.1 | 48% | 1.00E-07 | 65% | XP_023811886.1 |
| MTSS1-like protein isoform X1 [ <i>Boleophthalmus pectinirostris</i> ] | 52.8 | 52.8 | 56% | 2.00E-07 | 68% | XP_020786751.1 |
| MTSS1-like protein isoform X1 [ <i>Cynoglossus semilaevis</i> ]        | 53.1 | 53.1 | 42% | 2.00E-07 | 78% | XP_008310587.1 |
| MTSS1-like protein isoform X1 [ <i>Kryptolebias marmoratus</i> ]       | 52.8 | 52.8 | 48% | 2.00E-07 | 65% | XP_017274520.1 |
| MTSS1-like protein isoform X1 [ <i>Maylandia zebra</i> ]               | 52.8 | 52.8 | 44% | 2.00E-07 | 71% | XP_004570835.1 |
| MTSS1-like protein isoform X1 [ <i>Oncorhynchus mykiss</i> ]           | 52.4 | 52.4 | 47% | 3.00E-07 | 72% | XP_021430036.1 |
| MTSS1-like protein isoform X1 [ <i>Salvelinus alpinus</i> ]            | 52.0 | 52.0 | 48% | 4.00E-07 | 70% | XP_023827760.1 |
| MTSS1-like protein isoform X1 [ <i>Seriola dumerili</i> ]              | 51.2 | 51.2 | 51% | 7.00E-07 | 69% | XP_022610317.1 |
| MTSS1-like protein isoform X1 [ <i>Seriola lalandi dorsalis</i> ]      | 51.2 | 51.2 | 51% | 7.00E-07 | 69% | XP_023271283.1 |
| MTSS1-like protein isoform X1 [ <i>Acanthochromis polyacanthus</i> ]   | 50.8 | 50.8 | 50% | 1.00E-06 | 61% | XP_022045320.1 |
| MTSS1-like protein isoform X1 [ <i>Amphiprion ocellaris</i> ]          | 50.4 | 50.4 | 50% | 1.00E-06 | 61% | XP_023155739.1 |
| MTSS1-like protein isoform X1 [ <i>Xiphophorus couchianus</i> ]        | 50.4 | 50.4 | 44% | 1.00E-06 | 71% | XP_027854880.1 |

|                                                                      |      |      |     |          |     |                |
|----------------------------------------------------------------------|------|------|-----|----------|-----|----------------|
| MTSS1-like protein isoform X1<br>[ <i>Xiphophorus maculatus</i> ]    | 50.4 | 50.4 | 44% | 1.00E-06 | 71% | XP_014325801.2 |
| MTSS1-like protein isoform X1 [ <i>Oryzias melastigma</i> ]          | 49.7 | 49.7 | 53% | 2.00E-06 | 59% | XP_024137089.1 |
| MTSS1-like protein isoform X2<br>[ <i>Monopterus albus</i> ]         | 49.3 | 49.3 | 44% | 3.00E-06 | 68% | XP_020458629.1 |
| MTSS1-like protein isoform X1 [ <i>Danio rerio</i> ]                 | 48.9 | 48.9 | 42% | 5.00E-06 | 72% | XP_017212570.1 |
| MTSS1-like protein [ <i>Liparis tanakae</i> ]                        | 48.5 | 48.5 | 55% | 6.00E-06 | 57% | TNN68000.1     |
| MTSS1-like protein isoform X1 [ <i>Gouania willdenowii</i> ]         | 48.5 | 48.5 | 44% | 6.00E-06 | 71% | XP_028305884.1 |
| MTSS1 isoform X4 [ <i>Labeo rohita</i> ]                             | 48.5 | 48.5 | 53% | 7.00E-06 | 53% | RXN11023.1     |
| MTSS1-like protein isoform X1 [ <i>Astyanax mexicanus</i> ]          | 47.8 | 47.8 | 53% | 1.00E-05 | 53% | XP_015461633.1 |
| MTSS1-like protein [ <i>Bagarius yarrelli</i> ]                      | 47.0 | 47.0 | 40% | 2.00E-05 | 71% | TSK19988.1     |
| MTSS1-like protein [ <i>Electrophorus electricus</i> ]               | 46.6 | 46.6 | 39% | 3.00E-05 | 73% | XP_026860561.1 |
| MTSS1-like protein isoform X1<br>[ <i>Tachysurus fulvidraco</i> ]    | 46.6 | 46.6 | 39% | 3.00E-05 | 73% | XP_026992805.1 |
| MTSS1-like protein [ <i>Triplophysa tibetana</i> ]                   | 46.2 | 46.2 | 38% | 4.00E-05 | 76% | KAA0723585.1   |
| MTSS1-like protein [ <i>Collichthys lucidus</i> ]                    | 45.8 | 45.8 | 53% | 5.00E-05 | 54% | TKS70314.1     |
| MTSS1-like protein isoform X1<br>[ <i>Paramormyrops kingsleyae</i> ] | 45.8 | 45.8 | 38% | 7.00E-05 | 76% | XP_023678497.1 |
| MTSS1-like protein isoform X7 [ <i>Carassius auratus</i> ]           | 45.8 | 45.8 | 40% | 7.00E-05 | 68% | XP_026114869.1 |
| Protein MTSS 1 isoform X1 [ <i>Myripristis murdjan</i> ]             | 44.7 | 44.7 | 53% | 2.00E-04 | 59% | XP_029919987.1 |

|                                                                            |      |      |     |          |     |                |
|----------------------------------------------------------------------------|------|------|-----|----------|-----|----------------|
| Protein MTSS 1-like isoform X1<br>[ <i>Archocentrus centrarchus</i> ]      | 44.3 | 44.3 | 42% | 2.00E-04 | 59% | XP_030605358.1 |
| MTSS1-like protein [ <i>Anabarrilius grahami</i> ]                         | 43.5 | 43.5 | 39% | 3.00E-04 | 70% | ROL43599.1     |
| Protein MTSS 1 isoform X1 [ <i>Salmo trutta</i> ]                          | 43.5 | 43.5 | 38% | 4.00E-04 | 66% | XP_029587687.1 |
| Protein MTSS 1-like [ <i>Sphaerama orbicularis</i> ]                       | 43.5 | 43.5 | 36% | 4.00E-04 | 71% | XP_029985766.1 |
| Protein MTSS 1 isoform X10 [ <i>Takifugu rubripes</i> ]                    | 43.1 | 43.1 | 51% | 5.00E-04 | 54% | XP_029694179.1 |
| MTSS1-like protein isoform X1<br>[ <i>Astatotilapia calliptera</i> ]       | 43.1 | 43.1 | 44% | 5.00E-04 | 59% | XP_026031589.1 |
| Protein MTSS 1 isoform X2<br>[ <i>Oncorhynchus kisutch</i> ]               | 42.7 | 42.7 | 34% | 6.00E-04 | 69% | XP_031649443.1 |
| Protein MTSS 1 isoform X2<br>[ <i>Oncorhynchus nerka</i> ]                 | 42.7 | 42.7 | 34% | 6.00E-04 | 69% | XP_029514111.1 |
| Metastasis suppressor protein 1 [ <i>Takifugu flavidus</i> ]               | 43.1 | 43.1 | 51% | 6.00E-04 | 54% | TWW79466.1     |
| Protein MTSS 1 isoform X1 [ <i>Esox lucius</i> ]                           | 42.4 | 42.4 | 34% | 0.001    | 69% | XP_012988144.1 |
| Protein MTSS 1-like isoform X1<br>[ <i>Oreochromis aureus</i> ]            | 42.0 | 42.0 | 40% | 0.001    | 55% | XP_031607691.1 |
| Protein MTSS 1-like isoform X1<br>[ <i>Periophthalmus magnuspinnatus</i> ] | 42.0 | 42.0 | 55% | 0.001    | 45% | XP_033836399.1 |
| Protein MTSS 1-like isoform X1<br>[ <i>Scleropages formosus</i> ]          | 42.4 | 42.4 | 51% | 0.001    | 54% | XP_018582727.1 |
| Protein MTSS 1-like [ <i>Thalassophryne amazonica</i> ]                    | 41.6 | 41.6 | 35% | 0.002    | 63% | XP_034031131.1 |
| Protein MTSS 1-like isoform X1<br>[ <i>Xiphophorus hellerii</i> ]          | 41.6 | 41.6 | 47% | 0.002    | 46% | XP_032414486.1 |
| Protein MTSS 1 [ <i>Salarias fasciatus</i> ]                               | 41.2 | 41.2 | 50% | 0.003    | 55% | XP_029976858.1 |

|                                                                      |      |      |     |       |     |                |
|----------------------------------------------------------------------|------|------|-----|-------|-----|----------------|
| Protein MTSS 1 isoform X1<br>[ <i>Mastacembelus armatus</i> ]        | 40.8 | 40.8 | 32% | 0.003 | 72% | XP_026156241.1 |
| Protein MTSS 1 isoform X1 [ <i>Anabas testudineus</i> ]              | 40.4 | 40.4 | 32% | 0.004 | 68% | XP_026205192.1 |
| Protein MTSS 1 isoform X1 [ <i>Anarrhichthys ocellatus</i> ]         | 40.8 | 40.8 | 32% | 0.004 | 72% | XP_031734352.1 |
| Protein MTSS 1 isoform X1 [ <i>Betta splendens</i> ]                 | 40.8 | 40.8 | 32% | 0.004 | 76% | XP_029023590.1 |
| Protein MTSS 1 isoform X1 [ <i>Clupea harengus</i> ]                 | 40.4 | 40.4 | 42% | 0.005 | 56% | XP_031441805.1 |
| Protein MTSS 1-like isoform X1<br>[ <i>Trematomus bernacchii</i> ]   | 39.7 | 39.7 | 34% | 0.009 | 65% | XP_033980648.1 |
| Protein MTSS 1 [ <i>Cottoperca gobio</i> ]                           | 39.7 | 39.7 | 34% | 0.010 | 65% | XP_029298934.1 |
| Protein MTSS 1-like [ <i>Cyclopterus lumpus</i> ]                    | 39.7 | 39.7 | 55% | 0.010 | 52% | XP_034401059.1 |
| Protein MTSS 1-like isoform X1<br>[ <i>Epinephelus lanceolatus</i> ] | 39.7 | 39.7 | 32% | 0.010 | 68% | XP_033493401.1 |
| Protein MTSS 1-like isoform X5 [ <i>Chanos chanos</i> ]              | 39.7 | 39.7 | 31% | 0.010 | 67% | XP_030637832.1 |
| Protein MTSS 1 isoform X1 [ <i>Sander lucioperca</i> ]               | 39.3 | 39.3 | 32% | 0.011 | 68% | XP_031163545.1 |
| Protein MTSS 1-like isoform X1 [ <i>Labrus bergylta</i> ]            | 39.3 | 39.3 | 35% | 0.012 | 59% | XP_020490214.1 |
| Protein MTSS 1-like isoform X4 [ <i>Gadus morhua</i> ]               | 38.9 | 38.9 | 47% | 0.018 | 47% | XP_030227262.1 |
| Protein MTSS 1-like isoform X1 [ <i>Echeneis naucrates</i> ]         | 38.5 | 38.5 | 32% | 0.022 | 68% | XP_029370024.1 |
| Protein MTSS 1-like isoform X2<br>[ <i>Etheostoma spectabile</i> ]   | 38.1 | 38.1 | 32% | 0.030 | 60% | XP_032373927.1 |
| Protein MTSS 1-like isoform X1 [ <i>Sparus aurata</i> ]              | 38.1 | 38.1 | 32% | 0.034 | 60% | XP_030250116.1 |

|                                                                            |      |      |     |          |     |                |
|----------------------------------------------------------------------------|------|------|-----|----------|-----|----------------|
| Protein MTSS 1-like isoform X1<br>[ <i>Gymnodraco acuticeps</i> ]          | 36.6 | 36.6 | 32% | 0.100    | 56% | XP_034064480.1 |
| Protein MTSS 1-like isoform X6<br>[ <i>Denticeps clupeoides</i> ]          | 36.2 | 36.2 | 31% | 0.150    | 58% | XP_028841159.1 |
| Protein MTSS 1-like isoform X1<br>[ <i>Pseudochaenichthys georgianus</i> ] | 36.2 | 36.2 | 32% | 0.170    | 56% | XP_033958033.1 |
| Protein MTSS 1 isoform X2<br>[ <i>Pangasianodon hypophthalmus</i> ]        | 35.0 | 35.0 | 34% | 0.370    | 62% | XP_034163490.1 |
| Protein MTSS 2-like isoform X1 [ <i>Gadus morhua</i> ]                     | 67.4 | 67.4 | 52% | 1.00E-12 | 82% | XP_030222100.1 |
| Protein MTSS 2-like isoform X1 [ <i>Sander lucioperca</i> ]                | 57.4 | 57.4 | 52% | 5.00E-09 | 73% | XP_031139049.1 |
| Protein MTSS 2-like isoform X2<br>[ <i>Sphaeramia orbicularis</i> ]        | 56.6 | 56.6 | 43% | 9.00E-09 | 82% | XP_029992579.1 |
| Protein MTSS 2-like isoform X1<br>[ <i>Archocentrus centrarchus</i> ]      | 55.5 | 55.5 | 48% | 2.00E-08 | 73% | XP_030588057.1 |
| Protein MTSS 2-like isoform X1 [ <i>Betta splendens</i> ]                  | 55.5 | 55.5 | 46% | 2.00E-08 | 74% | XP_029009980.1 |
| Protein MTSS 2-like isoform X1 [ <i>Echeneis naucrates</i> ]               | 55.1 | 55.1 | 44% | 3.00E-08 | 76% | XP_029378151.1 |
| Protein MTSS 2-like isoform X1<br>[ <i>Etheostoma spectabile</i> ]         | 55.1 | 55.1 | 44% | 3.00E-08 | 76% | XP_032379715.1 |
| Protein MTSS 2-like isoform X1<br>[ <i>Mastacembelus armatus</i> ]         | 55.1 | 55.1 | 50% | 3.00E-08 | 68% | XP_026168203.1 |
| Protein MTSS 2-like isoform X1 [ <i>Labrus bergylta</i> ]                  | 54.7 | 54.7 | 52% | 5.00E-08 | 68% | XP_020495426.1 |
| Protein MTSS 2-like isoform X1<br>[ <i>Oreochromis aureus</i> ]            | 54.3 | 54.3 | 44% | 6.00E-08 | 76% | XP_031585857.1 |
| Protein MTSS 2-like isoform X1<br>[ <i>Myripristis murdjan</i> ]           | 53.9 | 53.9 | 55% | 8.00E-08 | 74% | XP_029910332.1 |
| Protein MTSS 2-like isoform X3<br>[ <i>Cottoperca gobio</i> ]              | 53.1 | 53.1 | 56% | 1.00E-07 | 63% | XP_029289404.1 |

|                                                                   |      |      |     |          |     |                |
|-------------------------------------------------------------------|------|------|-----|----------|-----|----------------|
| Protein MTSS 2-like isoform X3 [ <i>Salarias fasciatus</i> ]      | 53.5 | 53.5 | 53% | 1.00E-07 | 68% | XP_029951351.1 |
| Protein MTSS 2-like isoform X1 [ <i>Oncorhynchus nerka</i> ]      | 52.8 | 52.8 | 47% | 2.00E-07 | 72% | XP_029523587.1 |
| Protein MTSS 2-like isoform X1 [ <i>Anarrhichthys ocellatus</i> ] | 52.4 | 52.4 | 51% | 3.00E-07 | 67% | XP_031712059.1 |
| Protein MTSS 2-like isoform X1 [ <i>Salmo trutta</i> ]            | 52.0 | 52.0 | 46% | 3.00E-07 | 74% | XP_029614707.1 |
| Protein MTSS 2 isoform X1 [ <i>Oncorhynchus kisutch</i> ]         | 52.0 | 52.0 | 48% | 4.00E-07 | 70% | XP_031678809.1 |
| Protein MTSS 2 isoform X3 [ <i>Takifugu rubripes</i> ]            | 49.3 | 49.3 | 48% | 3.00E-06 | 69% | XP_029697449.1 |
| Protein MTSS 2 isoform X1 [ <i>Esox lucius</i> ]                  | 47.0 | 47.0 | 35% | 2.00E-05 | 81% | XP_019910660.1 |
| Protein MTSS 2 isoform X4 [ <i>Epinephelus lanceolatus</i> ]      | 47.0 | 47.0 | 56% | 2.00E-05 | 53% | XP_033484457.1 |
| Protein MTSS 2 isoform X1 [ <i>Anabas testudineus</i> ]           | 46.6 | 46.6 | 53% | 3.00E-05 | 54% | XP_026233593.1 |
| Protein MTSS 2 isoform X1 [ <i>Clupea harengus</i> ]              | 46.6 | 46.6 | 50% | 3.00E-05 | 61% | XP_031425490.1 |
| Protein MTSS 2 isoform X1 [ <i>Pangasianodon hypophthalmus</i> ]  | 47.0 | 47.0 | 39% | 3.00E-05 | 73% | XP_026793306.1 |
| Protein MTSS 2-like isoform X1 [ <i>Sparus aurata</i> ]           | 46.6 | 46.6 | 53% | 3.00E-05 | 54% | XP_030271134.1 |
| Protein MTSS 2-like isoform X4 [ <i>Xiphophorus hellerii</i> ]    | 46.6 | 46.6 | 52% | 3.00E-05 | 55% | XP_032415837.1 |
| Protein MTSS 2 [ <i>Chanos chanos</i> ]                           | 46.2 | 46.2 | 39% | 4.00E-05 | 73% | XP_030620864.1 |
| Protein MTSS 2 isoform X1 [ <i>Denticeps clupeoides</i> ]         | 45.8 | 45.8 | 38% | 6.00E-05 | 76% | XP_028811704.1 |
| Protein MTSS 2 isoform X5 [ <i>Scleropages formosus</i> ]         | 45.8 | 45.8 | 38% | 6.00E-05 | 76% | XP_029109165.1 |

|                           |                |                                                                       |      |      |     |          |     |                |                                                                                                                                                                                                                                                  |
|---------------------------|----------------|-----------------------------------------------------------------------|------|------|-----|----------|-----|----------------|--------------------------------------------------------------------------------------------------------------------------------------------------------------------------------------------------------------------------------------------------|
|                           |                | Protein MTSS 2 isoform X1 [ <i>Cyclopterus lumpus</i> ]               | 45.4 | 45.4 | 56% | 7.00E-05 | 53% | XP_034418560.1 |                                                                                                                                                                                                                                                  |
|                           |                | Protein MTSS 2 isoform X1 [ <i>Pseudochaenichthys georgianus</i> ]    | 44.3 | 44.3 | 56% | 2.00E-04 | 54% | XP_033960734.1 |                                                                                                                                                                                                                                                  |
|                           |                | Protein MTSS 2-like isoform X1 [ <i>Trematomus bernacchii</i> ]       | 44.3 | 44.3 | 56% | 2.00E-04 | 54% | XP_033972491.1 |                                                                                                                                                                                                                                                  |
|                           |                | Protein MTSS 2-like isoform X1 [ <i>Gymnodraco acuticeps</i> ]        | 43.9 | 43.9 | 52% | 3.00E-04 | 55% | XP_034087772.1 |                                                                                                                                                                                                                                                  |
|                           |                | Protein MTSS 2 isoform X1 [ <i>Thalassophryne amazonica</i> ]         | 43.5 | 43.5 | 50% | 4.00E-04 | 55% | XP_034039392.1 |                                                                                                                                                                                                                                                  |
|                           |                | Protein MTSS 2 isoform X1 [ <i>Periophthalmus magnuspinnatus</i> ]    | 43.1 | 43.1 | 52% | 5.00E-04 | 53% | XP_033845144.1 |                                                                                                                                                                                                                                                  |
| Mmer-EST_8.2 <sup>‡</sup> | ERR048976.6906 | protein scribble homolog isoform X1 [ <i>Monopterus albus</i> ]       | 49.7 | 49.7 | 34% | 3.00E-06 | 82% | XP_020473123.1 | AGGAGGTGGATGCGGGGGTGTGGAGGACATGGCGCTGTACAGCAACAAACGCAAACTGAGAGCGGGCCGCCACAGCCTGGAGGCGCGGTCCCCACATAACACCGACACACACACACACAGAACCCGCGCCGACCCGCGAGGACCGCCTGATGTATGGAAACCACTGCGGGAAAACAATGGAGACGATCCAACGACCATCCGAACTTTTCACTAGTAGTCAC TTCCTGCTTGCGTCTAGG |
|                           |                | protein scribble homolog isoform X10 [ <i>Tachysurus fulvidraco</i> ] | 48.5 | 48.5 | 30% | 9.00E-06 | 88% | XP_027025169.1 |                                                                                                                                                                                                                                                  |
|                           |                | protein scribble homolog isoform X1 [ <i>Carassius auratus</i> ]      | 47.8 | 47.8 | 30% | 1.00E-05 | 88% | XP_026071392.1 |                                                                                                                                                                                                                                                  |
|                           |                | protein scribble homolog isoform X11 [ <i>Gadus morhua</i> ]          | 48.1 | 48.1 | 37% | 1.00E-05 | 77% | XP_030204161.1 |                                                                                                                                                                                                                                                  |
|                           |                | protein scribble homolog isoform X13 [ <i>Xiphophorus hellerii</i> ]  | 46.6 | 46.6 | 30% | 3.00E-05 | 88% | XP_032406893.1 |                                                                                                                                                                                                                                                  |
|                           |                | protein scribble homolog isoform X7 [ <i>Xiphophorus maculatus</i> ]  | 46.6 | 46.6 | 30% | 3.00E-05 | 88% | XP_023182532.1 |                                                                                                                                                                                                                                                  |
|                           |                | protein scribble homolog isoform X1 [ <i>Amphiprion ocellaris</i> ]   | 46.6 | 46.6 | 30% | 4.00E-05 | 88% | XP_023128465.1 |                                                                                                                                                                                                                                                  |
|                           |                | protein scribble homolog isoform X1 [ <i>Xiphophorus couchianus</i> ] | 46.6 | 46.6 | 30% | 4.00E-05 | 88% | XP_027860506.1 |                                                                                                                                                                                                                                                  |



|                                                                            |      |      |     |          |     |                |
|----------------------------------------------------------------------------|------|------|-----|----------|-----|----------------|
| protein scribble homolog [ <i>Scleropages formosus</i> ]                   | 45.4 | 45.4 | 34% | 9.00E-05 | 75% | XP_029107910.1 |
| protein scribble homolog [ <i>Boleophthalmus pectinirostris</i> ]          | 45.1 | 45.1 | 30% | 1.00E-04 | 84% | XP_020791390.1 |
| protein scribble homolog [ <i>Dicentrarchus labrax</i> ]                   | 45.1 | 45.1 | 30% | 1.00E-04 | 84% | CBN82113.1     |
| protein scribble homolog [ <i>Oreochromis aureus</i> ]                     | 45.1 | 45.1 | 30% | 1.00E-04 | 84% | XP_031607551.1 |
| protein scribble homolog [ <i>Oryzias melastigma</i> ]                     | 45.4 | 45.4 | 31% | 1.00E-04 | 81% | XP_024119694.1 |
| protein scribble homolog isoform X1 [ <i>Acanthochromis polyacanthus</i> ] | 45.1 | 45.1 | 30% | 1.00E-04 | 84% | XP_022055054.1 |
| protein scribble homolog isoform X1 [ <i>Anabas testudineus</i> ]          | 45.1 | 45.1 | 30% | 1.00E-04 | 84% | XP_026217627.1 |
| protein scribble homolog isoform X1 [ <i>Archocentrus centrarchus</i> ]    | 45.1 | 45.1 | 30% | 1.00E-04 | 84% | XP_030612518.1 |
| protein scribble homolog isoform X1 [ <i>Astatotilapia calliptera</i> ]    | 45.1 | 45.1 | 30% | 1.00E-04 | 84% | XP_026035712.1 |
| protein scribble homolog isoform X1 [ <i>Chanos chanos</i> ]               | 45.1 | 45.1 | 30% | 1.00E-04 | 84% | XP_030635367.1 |
| protein scribble homolog isoform X1 [ <i>Epinephelus lanceolatus</i> ]     | 45.1 | 45.1 | 30% | 1.00E-04 | 84% | XP_033494342.1 |
| protein scribble homolog isoform X1 [ <i>Gouania willdenowi</i> ]          | 45.1 | 45.1 | 30% | 1.00E-04 | 84% | XP_028289660.1 |
| protein scribble homolog isoform X1 [ <i>Gymnodraco acuticeps</i> ]        | 45.1 | 45.1 | 30% | 1.00E-04 | 84% | XP_034070061.1 |
| protein scribble homolog isoform X1 [ <i>Kryptolebias marmoratus</i> ]     | 45.1 | 45.1 | 30% | 1.00E-04 | 84% | XP_017262004.1 |
| protein scribble homolog isoform X1 [ <i>Labrus bergylta</i> ]             | 45.1 | 45.1 | 30% | 1.00E-04 | 84% | XP_020489301.1 |
| protein scribble homolog isoform X1 [ <i>Laramichthys crocea</i> ]         | 45.1 | 45.1 | 30% | 1.00E-04 | 84% | XP_027130097.1 |

|                                                                               |      |      |     |          |     |                |
|-------------------------------------------------------------------------------|------|------|-----|----------|-----|----------------|
| protein scribble homolog isoform X1<br>[ <i>Mastacembelus armatus</i> ]       | 45.1 | 45.1 | 30% | 1.00E-04 | 84% | XP_026148266.1 |
| protein scribble homolog isoform X1<br>[ <i>Maylandia zebra</i> ]             | 45.1 | 45.1 | 30% | 1.00E-04 | 84% | XP_012774778.2 |
| protein scribble homolog isoform X1<br>[ <i>Myripristis murdjan</i> ]         | 45.1 | 45.1 | 30% | 1.00E-04 | 84% | XP_029935660.1 |
| protein scribble homolog isoform X1<br>[ <i>Oreochromis niloticus</i> ]       | 45.1 | 45.1 | 30% | 1.00E-04 | 84% | XP_025765932.1 |
| protein scribble homolog isoform X1<br>[ <i>Pangasianodon hypophthalmus</i> ] | 45.1 | 45.1 | 30% | 1.00E-04 | 84% | XP_034159795.1 |
| protein scribble homolog isoform X1<br>[ <i>Parambassis ranga</i> ]           | 45.1 | 45.1 | 30% | 1.00E-04 | 84% | XP_028288809.1 |
| protein scribble homolog isoform X1<br>[ <i>Paramormyrops kingsleyae</i> ]    | 45.1 | 45.1 | 34% | 1.00E-04 | 75% | XP_023688580.1 |
| protein scribble homolog isoform X1<br>[ <i>Seriola dumerili</i> ]            | 45.1 | 45.1 | 30% | 1.00E-04 | 84% | XP_022622774.1 |
| protein scribble homolog isoform X1<br>[ <i>Seriola lalandi dorsalis</i> ]    | 45.1 | 45.1 | 30% | 1.00E-04 | 84% | XP_023264122.1 |
| protein scribble homolog isoform X1<br>[ <i>Sparus aurata</i> ]               | 45.1 | 45.1 | 30% | 1.00E-04 | 84% | XP_030254688.1 |
| protein scribble homolog isoform X1<br>[ <i>Sphaeramia orbicularis</i> ]      | 45.1 | 45.1 | 30% | 1.00E-04 | 84% | XP_029979702.1 |
| protein scribble homolog isoform X1<br>[ <i>Takifugu rubripes</i> ]           | 45.1 | 45.1 | 30% | 1.00E-04 | 84% | XP_029698381.1 |
| protein scribble homolog isoform X1<br>[ <i>Trematomus bernacchii</i> ]       | 45.1 | 45.1 | 30% | 1.00E-04 | 84% | XP_034004346.1 |
| protein scribble homolog isoform X10<br>[ <i>Anarrhichthys ocellatus</i> ]    | 45.1 | 45.1 | 30% | 1.00E-04 | 84% | XP_031705692.1 |
| protein scribble –like protein [ <i>Takifugu flavidus</i> ]                   | 45.1 | 45.1 | 30% | 1.00E-04 | 84% | TWW70794.1     |
| protein scribble –like protein Scribble1<br>[ <i>Channa argus</i> ]           | 45.1 | 45.1 | 30% | 1.00E-04 | 84% | KAF3703730.1   |

|                                                                       |      |      |     |          |     |                |
|-----------------------------------------------------------------------|------|------|-----|----------|-----|----------------|
| protein scribble homolog [ <i>Danio rerio</i> ]                       | 44.7 | 44.7 | 30% | 2.00E-04 | 84% | NP_001007176.1 |
| protein scribble homolog [ <i>Fundulus heteroclitus</i> ]             | 45.1 | 45.1 | 30% | 2.00E-04 | 84% | XP_021167343.1 |
| protein scribble homolog isoform X1 [ <i>Esox lucius</i> ]            | 45.1 | 45.1 | 30% | 2.00E-04 | 84% | XP_019897341.2 |
| protein scribble –like protein [ <i>Triplophysa tibetana</i> ]        | 44.7 | 44.7 | 30% | 2.00E-04 | 84% | KAA0723516.1   |
| protein scribble homolog isoform X1 [ <i>Salarias fasciatus</i> ]     | 44.3 | 44.3 | 30% | 3.00E-04 | 80% | XP_029955840.1 |
| protein scribble homolog isoform X2 [ <i>Clupea harengus</i> ]        | 43.9 | 43.9 | 36% | 3.00E-04 | 70% | XP_031439491.1 |
| protein scribble-like protein [ <i>Perca flavescens</i> ]             | 43.9 | 43.9 | 31% | 3.00E-04 | 77% | ADX97060.1     |
| protein scribble homolog isoform X13 [ <i>Etheostoma spectabile</i> ] | 43.5 | 43.5 | 30% | 4.00E-04 | 80% | XP_032359907.1 |
| protein scribble homolog isoform X1 [ <i>Sander lucioperca</i> ]      | 43.5 | 43.5 | 30% | 5.00E-04 | 80% | XP_031148678.1 |
| protein scribble homolog isoform X1 [ <i>Astyanax mexicanus</i> ]     | 43.1 | 43.1 | 30% | 6.00E-04 | 80% | XP_022533770.1 |
| protein scribble homolog isoform X15 [ <i>Denticeps clupeoides</i> ]  | 43.1 | 43.1 | 30% | 6.00E-04 | 80% | XP_028815868.1 |
| protein scribble homolog [ <i>Electrophorus electricus</i> ]          | 43.1 | 43.1 | 31% | 7.00E-04 | 77% | XP_026875185.1 |
| protein scribble homolog isoform X7 [ <i>Oncorhynchus kisutch</i> ]   | 43.1 | 43.1 | 31% | 7.00E-04 | 77% | XP_031691911.1 |
| protein scribble homolog isoform X8 [ <i>Salvelinus alpinus</i> ]     | 43.1 | 43.1 | 31% | 7.00E-04 | 77% | XP_023828481.1 |
| protein scribble homolog [ <i>Oncorhynchus mykiss</i> ]               | 43.1 | 43.1 | 31% | 8.00E-04 | 77% | XP_021418548.1 |
| protein scribble homolog [ <i>Oncorhynchus tshawytscha</i> ]          | 42.7 | 42.7 | 31% | 8.00E-04 | 77% | XP_024248149.1 |

|             |              |                                                                                 |       |                                   |      |          |     |                |     |            |                                                                                                                                                                                                                                                                                               |
|-------------|--------------|---------------------------------------------------------------------------------|-------|-----------------------------------|------|----------|-----|----------------|-----|------------|-----------------------------------------------------------------------------------------------------------------------------------------------------------------------------------------------------------------------------------------------------------------------------------------------|
|             |              | protein scribble homolog isoform X1<br>[ <i>Salmo trutta</i> ]                  | 42.7  | 42.7                              | 31%  | 8.00E-04 | 77% | XP_029611790.1 |     |            |                                                                                                                                                                                                                                                                                               |
|             |              | protein scribble homolog isoform X1<br>[ <i>Oryzias latipes</i> ]               | 42.7  | 42.7                              | 30%  | 9.00E-04 | 80% | XP_023805912.1 |     |            |                                                                                                                                                                                                                                                                                               |
|             |              | protein scribble homolog isoform X1<br>[ <i>Pseudochaenichthys georgianus</i> ] | 42.4  | 42.4                              | 30%  | 0.001    | 80% | XP_033964577.1 |     |            |                                                                                                                                                                                                                                                                                               |
|             |              | protein scribble homolog isoform X10<br>[ <i>Oncorhynchus nerka</i> ]           | 34.7  | 34.7                              | 28%  | 0.640    | 70% | XP_029482776.1 |     |            |                                                                                                                                                                                                                                                                                               |
|             |              |                                                                                 |       |                                   |      |          |     |                |     |            |                                                                                                                                                                                                                                                                                               |
|             | Mmer-EST_8.3 | ERR048977.54842                                                                 | RASF3 | [ <i>Poeciliopsis prolifica</i> ] | 29.6 | 29.6     | 32% | 7.6            | 57% | JAO86479.1 | GCTGGCGCCCCCTGCCGCCGCCCTCGGCCCTCGCACGGT<br>CATTGGTCGGCGGATGCTCCGGAGAGGCTCCTCCACTA<br>CCCACCTGATGGGGCGTCTGCTGAAGTTTAAAGGTGGTG<br>ATGGTGGT <b>TGCTGCTGCTGCTGCTGCTGCTGCTGCTCA</b><br>CTGGCCGGTTCTGTATCCTGGTGATGGTGGCAGATGAT<br>GGTT                                                              |
|             |              |                                                                                 |       |                                   |      |          |     |                |     |            |                                                                                                                                                                                                                                                                                               |
|             | Mmer-EST_8.4 | ERR048980.23857                                                                 | NPM   |                                   |      |          |     |                |     |            | TGCAGCATTACTTGTCGCCTCGCCTTTTGCGACGGCTAC<br>ATTCTGAGAAATCTCGATTTCCATGCAGTCTTTTGATAC<br>TGATAATCCCATCCCACTTTAATTCAGCAGACCATTCGG<br>TAAGTCAGTCGGTCAT <b>TCATTCATTCATTCATTCATTC</b><br><b>ATTCACAGTACGTTTGTGGACCTAACCGATGTTTCATT</b><br>TCCTAAACTGTTGGGTAAATTGTGTTGTGTGTTGTCCAC<br>AGCT           |
|             |              |                                                                                 |       |                                   |      |          |     |                |     |            |                                                                                                                                                                                                                                                                                               |
| Tetraplex 4 | Mmer-EST_3.1 | ERR048979.11233                                                                 | NPM   |                                   |      |          |     |                |     |            | GGGCTATAATGGCATCGCTATGCGTTATGGGAGAACTG<br>TGAT <b>ATATATATATA</b> AAATAAATAAACAGTCAAATTAG<br>GATACATTCTTGGTCCATCTTAAACACTAGGTCAATATT<br>CTAAATAGGAATAAAACAACAAATTTGACCATCACCCCG<br>TTTTAACACATTAGGGTGACACAAATAACTGATCATATT<br>AAGTCTACAAATTTGGATTGAACTCTGGGGCGGGGG<br>GCTGTCCATGGGAAGTGGTAGAT |
|             |              |                                                                                 |       |                                   |      |          |     |                |     |            |                                                                                                                                                                                                                                                                                               |
|             | Mmer-EST_6.3 | ERR048978.33848                                                                 | NPM   |                                   |      |          |     |                |     |            | CAATAGGCATGTATTGCACACACTACTTGTGCCGCTGT<br>CTAGCTTAGCCCGACGCTAACTGCTGTAGCGCACTTAAG<br>TAGTGTAGTGTGTCCTTGGTAACTAACCCCTGCCTCCCTC<br>TTCCT <b>TCCTCCTCCTCCTCCTCCTCCTCCT</b> TATCCCGGTGCA<br>CGGTTTCTTCTTTGATGCTAGGGTTAAACCAGACCCCTC<br>CCCCTCCTCNNCTCCTCCTCCTCCCTCCCTCCT                          |
|             |              |                                                                                 |       |                                   |      |          |     |                |     |            |                                                                                                                                                                                                                                                                                               |
|             | Mmer-EST_6.4 | ERR048981.36397                                                                 | NPM   |                                   |      |          |     |                |     |            | GTTGGGCAACTTTCCTTTAGTTTGCCCGGGAACGACGC<br><b>CGCCGCCGCCGCCGCTCGCGACTCCACGCTGACGCAG</b><br>ACGACGCTC <b>CCCGAACTTTCTTGGGGTCGGAACAACGT</b>                                                                                                                                                      |

|                                              |  |                                                                                                                                                                                                                                                                                                   |
|----------------------------------------------|--|---------------------------------------------------------------------------------------------------------------------------------------------------------------------------------------------------------------------------------------------------------------------------------------------------|
|                                              |  | GTCGTCGGGAAATGGGTTCGCCTCGCGCCACGCTCCCC<br>GCACATA                                                                                                                                                                                                                                                 |
| Mmer-EST_9.4 ERR048980.47967 NPM             |  | CCCCGATCAACCCGGGAGAGTTGGCAACCATAGTCCCCT<br>ATGCTAGTAAAACAAAAAAAAAACACAACCCAATTGTGA<br>GCTGTATCTGCTTTAATGAAGTATGTATGTATGTATGT<br><b>ATGTATGTATGTATGTATGTATGTATGTATGT</b> CATTAAACC<br>ATGGATTACAGAAACACATTGAACATATAATACTTGAC<br>ATACACGCAATACTCTCTCTATACTGAACCCGTCCTG<br>AAAAGCTG                  |
| Tetraplex 5 Mmer-EST_2.1 ERR048977.35422 NPM |  | CGGACGGCAACCACAACGATATCCTTTCCTGTGGCTCAT<br>CTTTC <b>ACGGCGGGCGGCCGGCGGGCGGC</b> CGCTCG<br>CCGTGTAGCGCTGGAGTCACATGACACGGCCAAAACCT<br>TTCCTCTATTATGTTATCAACAACACCTTCTTCCAATCTT<br>TTCCACGTTTTATTTAAAAATGGTCAACTACTGTATGTAT<br>TGTGGTGTGGTTGTGCACCGAGAGACCTCCCTAATTAGA<br>GACCAGCACCCAGGGGTCTCGGAGGG |
| Mmer-EST_2.2 ERR048980.37602 NPM             |  | GAGACGATGACCGATGGCTTCCAGGTGAGCCACCCGAA<br>ACAACATTTCAGACAATATTGCACTGCACTCTTTGTAC<br>AGTTCCATTGGTTGTGACAACCTCAAGTCAATGTATTGAG<br><b>TTATTATTATTATTATT</b> ATATGTTGTCCCTACTGTTGT<br>GTTATAAGTTGTACCAGCAGGGTCTTCTGAGCCAAACTC<br>TGAACCTTGACCCCTCTCTCTCCTCCTCAGTTCGAGTAT<br>GGCAGCG                   |
| Mmer-EST_4.3 ERR048978.72514 NPM             |  | TGAATAAATATAATGGAGAAATTAATAAATATTATCTA<br>GGACTCTGACTGCTTGTGGAGAAGTAAGTCGACATTTA<br>AGATGCGTCTCAGGATAAGTTGGGTCTGCTAACAGTCTT<br>AGCGCTGTCGGCATGTAATGACCCCA <b>ATGTTGTTGTTG</b><br><b>TTGTTGTTGTTGTTGTTG</b> TCGTCCTTACATTTCAATTCTG<br>CTTGTCCTGAATGTCAAGGCATTGATTTAAGCCGTACAT<br>TTAGTTTCTTTG      |
| Mmer-EST_2.4 ERR048982.60263 NPM             |  | CATGCTGTTGTGTGCTGGAGGATCTTGGCTGAAAGACTA<br>GAGGTAAAAATAAATAATAAAGGAATAAAGGACATGTCT<br>TTTAACACTTTCATTCCCTGGAGGGCGATTACGAAGAGC<br>AGTCAAAGTATAGAAATGTCA <b>GTTGTTGTTGTTGTTG</b><br>TATAGCAACGGAAAAACAACAGACCGGCTAAAGGTCGTG<br>AACTTTATCTTTCAACTTTATCTGTTTTCGTAGTATCGGG<br>TCACTATAGGTTATCAGCCG     |

**Table S3.** Statistical power (Pearson, chi-square method of POWSIM) of marker subsets (see Table 1) according to their cloning source (R, randomly cloned microsatellites; EST, transcriptome-diverted microsatellites) as well as to their selective classification after LOSITAN (directional selection) and BAYESCAN (balancing selection).

| Dataset                                   | Atlantic vs.<br>Mediterranean |              | Five regions |              |
|-------------------------------------------|-------------------------------|--------------|--------------|--------------|
|                                           | Power                         | Type I error | Power        | Type I error |
| All markers (n = 26)                      | 1.000                         | 0.033        | 1.000        | 0.026        |
| EST-microsatellites (n = 21)              | 1.000                         | 0.037        | 1.000        | 0.046        |
| Random microsatellites (n = 5)            | 1.000                         | 0.039        | 1.000        | 0.037        |
| <b>Lositan</b>                            |                               |              |              |              |
| 1 R directional marker (3b)               | 0.998                         | 0.040        | 1.000        | 0.024        |
| 4 R neutral markers (29, 34, 9b, 20)      | 1.000                         | 0.033        | 1.000        | 0.045        |
| 3 EST directional markers (9.1,14.2,6.4)  | -                             | -            | 1.000        | 0.033        |
| 18 EST neutral markers                    | -                             | -            | 1.000        | 0.027        |
| 4 R + 21EST neutral markers               | 1.000                         | 0.034        | -            | -            |
| 1 R + 3 EST directional markers           | -                             | -            | 1.000        | 0.035        |
| 4 R + 18 EST neutral markers              | -                             | -            | 1.000        | 0.033        |
| <b>BayeScan</b>                           |                               |              |              |              |
| 3 R balanced markers (34b, 9b, 20)        | 0.980                         | 0.030        | 1.000        | 0.041        |
| 2 R neutral markers (29, 3b)              | 1.000                         | 0.029        | 1.000        | 0.036        |
| 1 EST balanced marker (6.3)               | 0.196                         | 0.032        | -            | -            |
| 20 ESTs neutral markers                   | 1.000                         | 0.020        | -            | -            |
| 3 ESTs balanced markers (11.2, 13.3, 6.3) | -                             | -            | 1.000        | 0.023        |
| 18 ESTs neutral markers                   | -                             | -            | 1.000        | 0.037        |
| 3 R + 1EST balanced markers               | 0.947                         | 0.042        | -            | -            |
| 2 R + 20 EST neutral markers              | 1.000                         | 0.033        | -            | -            |
| 3 R + 3 EST balanced markers              | -                             | -            | 1.000        | 0.041        |
| 2 R + 18 EST neutral markers              | -                             | -            | 1.000        | 0.046        |

**Table S4.** Source of microsatellites (R, anonymous or random loci; EST, EST-loci) and their selective classification after two  $F_{ST}$ -outlier based algorithms, i.e. LOSITAN (neutral polymorphism *vs.* selectively diversified polymorphism); BAYESCAN (neutral polymorphism *vs.* selectively balanced polymorphism). Superscripts <sup>d</sup> to <sup>g</sup> indicate putative aberrant  $k$ -pool scenarios regarding previous demographic and genetic data in this species.

|                 |                     |                        | Level of population divergence            |                   |                       |                                                      |                    |                       |
|-----------------|---------------------|------------------------|-------------------------------------------|-------------------|-----------------------|------------------------------------------------------|--------------------|-----------------------|
|                 |                     |                        | Between basins (Atlantic - Mediterranean) |                   |                       | Among five regions from the whole range <sup>†</sup> |                    |                       |
|                 | Microsatellite type | Polymorphism           | No. Loci (code)                           | BAPS <sup>‡</sup> | GENELAND <sup>‡</sup> | No. Loci (code)                                      | BAPS <sup>§</sup>  | GENELAND <sup>§</sup> |
| <b>LOSITAN</b>  | Anonymous loci      | Directional            | 1 R (3b)                                  | $k = 2$           | $k = 2$               | 1 R (3b)                                             | $k = 2$            | $k = 2$               |
|                 |                     | Neutral                | 4 R (29, 34b, 9b, 20)                     | $k = 1$           | $k = 1$               | 4 R (29, 34b, 9b, 20)                                | $k = 1$            | $k = 3^{\text{¶}}$    |
|                 | EST-loci            | Directional            | 0                                         | -                 | -                     | 3 EST (9.1, 14.2, 6.4)                               | $k = 2^{\text{¶}}$ | $k = 2^{\text{¶}}$    |
|                 |                     | Neutral                | 21 EST                                    | $k = 1$           | $k = 2$               | 18 EST                                               | $k = 1$            | $k = 2$               |
|                 | All selective loci  | Directional            | 1 R (3b)                                  | $k = 2$           | $k = 2$               | 4 (1 R + 3 EST)                                      | $k = 2^{\text{¶}}$ | $k = 3^{\text{¶}}$    |
|                 | All neutral loci    | Neutral                | 25 (4 R + 21 EST)                         | $k = 1$           | $k = 2$               | 22 (4 R + 18 EST)                                    | $k = 1$            | $k = 1$               |
|                 | All loci            | Directional or neutral | 26 (5 R + 21 EST)                         | $k = 1$           | $k = 2$               | 26 (5 R + 21 EST)                                    | $k = 1$            | $k = 2$               |
| <b>BAYESCAN</b> | Anonymous loci      | Balanced               | 3R (34b, 9b, 20)                          | $k = 1$           | $k = 1$               | 3 R (34b, 9b, 20)                                    | $k = 1$            | $k = 3^{\text{¶}}$    |
|                 |                     | Neutral                | 2R (3b, 29)                               | $k = 2$           | $k = 2$               | 2 R (3b, 29)                                         | $k = 2$            | $k = 2$               |
|                 | EST-loci            | balanced               | 1 EST (6.3, no power)                     | $k = 1$           | $k = 1$               | 3 EST (13.3, 11.2, 6.3)                              | $k = 1$            | $k = 1$               |
|                 |                     | Neutral                | 20 EST                                    | $k = 1$           | $k = 2$               | 18 EST                                               | $k = 1$            | $k = 2^{\text{¶}}$    |
|                 | All selective loci  | Balanced               | 4 (3R + 1EST)                             | $k = 1$           | $k = 1$               | 6 (3 R + 3 EST)                                      | $k = 1$            | $k = 2^{\text{¶}}$    |
|                 | All neutral loci    | Neutral                | 22 (2 R + 20 EST)                         | $k = 1$           | $k = 2$               | 20 (2 R + 18 EST)                                    | $k = 1$            | $k = 2$               |
|                 | All loci            | Balanced or neutral    | 26 (5 R + 21 EST)                         | $k = 1$           | $k = 2$               | 26 (5 R + 21 EST)                                    | $k = 1$            | $k = 2$               |
|                 | Only neutral loci   | Neutral                | 21 neutral loci                           | $k = 1$           | $k = 2$               | 16 neutral loci                                      | $k = 1$            | $k = 2$               |

<sup>†</sup>Regional sample codes (see Figure 2 for details): NAN, North Atlantic North; CAN, Central Atlantic North; SAN, South Atlantic North; MEW, Western Mediterranean Sea; MEC, Central Mediterranean Sea.

<sup>‡</sup>Gene pool  $k = 1$  indicates a single hake genetic unit along the Atlantic and the Mediterranean,  $k = 2$  indicates a significant genetic split between those basins.

<sup>§</sup>Gene pool  $k = 1$  indicates a single hake genetic unit,  $k = 2$  indicates a significant split between Atlantic regions (NAN, CAN, SAN) and Mediterranean regions (MEW, MEC).

<sup>†</sup>Gene pool  $k = 3$  indicates a significant split between 3 groups of regions: Atlantic North (NAN, CAN), Gulf of Cadiz (SAN) and Central Mediterranean (MEC), but including the Mediterranean region MEW into the Atlantic North (NAN, CAN).

<sup>\*</sup>Gene pool  $k = 2$  indicates a significant split between some Atlantic regions (NAN, CAN) and the Mediterranean basin (MEW, MEC) but including the Atlantic Gulf of Cadiz region (SAN) into the Mediterranean Sea (MEW, MEC).

<sup>»</sup>Gene pool  $k = 3$  indicates a significant split between 3 groups of regions: Atlantic North (NAN, CAN), Gulf of Cadiz (SAN) and Mediterranean Sea (MEW, MEC).

<sup>‡</sup>Gene pool  $k = 2$  indicates a significant split between the Central Mediterranean region (MEC) and the rest of regions (NAN, CAN, SAN, MEW).



**Table S5.** Hierarchical AMOVA on Atlantic and Mediterranean hake regions and basins using nine subsets of microsatellites as classified per source (random loci and EST-diverted) as well as per selective role after LOSITAN (neutral loci vs. directional loci); SS, sum of squares; VC, variance component; %, percentage of variation;  $F$ , fixation index. \* indicates that the probability of the observed value was equal or smaller than expected by random ( $p \leq 0.01$ ); <sup>ns</sup>, non-significant  $p$ -value.

| Hierarchical Level                     | Source of variation        | SS       | VC       | %     | $F$                    |
|----------------------------------------|----------------------------|----------|----------|-------|------------------------|
| <b>Microsatellite source</b>           |                            |          |          |       |                        |
| 5 anonymous loci                       | Between basins             | 11.848   | 0.04101  | 1.81  | $F_{CT} = 0.018^{ns†}$ |
|                                        | Among regions within basin | 16.143   | 0.04880  | 2.16  | $F_{SC} = 0.022^*$     |
|                                        | Within regions             | 729.642  | 2.17240  | 96.03 | $F_{ST} = 0.040^*$     |
| 21 EST-loci                            | Between basins             | 41.542   | 0.16266  | 1.79  | $F_{CT} = 0.018^*$     |
|                                        | Among regions within basin | 55.084   | 0.17940  | 1.97  | $F_{SC} = 0.020^*$     |
|                                        | Within regions             | 2473.055 | 8.75424  | 96.24 | $F_{ST} = 0.038^*$     |
| 26 loci (5 anonymous and 21 EST)       | Between basins             | 53.390   | 0.20366  | 1.79  | $F_{CT} = 0.018^*$     |
|                                        | Among regions within basin | 71.227   | 0.22820  | 2.01  | $F_{SC} = 0.020^*$     |
|                                        | Within regions             | 3202.697 | 10.92664 | 96.20 | $F_{ST} = 0.038^*$     |
| <b>Neutral microsatellites</b>         |                            |          |          |       |                        |
| 4 anonymous and neutral loci           | Between basins             | 5.342    | 0.00653  | 0.35  | $F_{CT} = 0.004^{ns}$  |
|                                        | Among regions within basin | 13.233   | 0.03930  | 2.13  | $F_{SC} = 0.021^*$     |
|                                        | Within regions             | 610.940  | 1.79556  | 97.51 | $F_{ST} = 0.025^*$     |
| 18 EST and neutral loci                | Between basins             | 27.752   | 0.09693  | 1.24  | $F_{CT} = 0.012^*$     |
|                                        | Among regions within basin | 43.092   | 0.13089  | 1.67  | $F_{SC} = 0.017^*$     |
|                                        | Within regions             | 2137.234 | 7.60016  | 97.09 | $F_{ST} = 0.029^*$     |
| 22 neutral loci (4 anonymous + 18 EST) | Between basins             | 33.094   | 0.10347  | 1.07  | $F_{CT} = 0.011^*$     |
|                                        | Among regions within basin | 56.324   | 0.17019  | 1.76  | $F_{SC} = 0.018^*$     |
|                                        | Within regions             | 2748.174 | 9.39573  | 97.17 | $F_{ST} = 0.028^*$     |
| <b>Directional microsatellites</b>     |                            |          |          |       |                        |
| 1 anonymous and selective              | Between basins             | 6.506    | 0.03447  | 8.19  | $F_{CT} = 0.082^{ns†}$ |
|                                        | Among regions within basin | 2.911    | 0.00950  | 2.26  | $F_{SC} = 0.025^*$     |
|                                        | Within regions             | 118.702  | 0.37683  | 89.55 | $F_{ST} = 0.104^*$     |
| 3 EST and selective                    | Between basins             | 13.790   | 0.06572  | 5.18  | $F_{CT} = 0.052^{ns†}$ |
|                                        | Among regions within basin | 11.992   | 0.04851  | 3.82  | $F_{SC} = 0.040^*$     |
|                                        | Within regions             | 335.821  | 1.15408  | 90.99 | $F_{ST} = 0.090^*$     |
| 4 selective loci (1 anonymous + 3 EST) | Between basins             | 20.296   | 0.10020  | 5.93  | $F_{CT} = 0.059^*$     |
|                                        | Among regions within basin | 14.903   | 0.05801  | 3.43  | $F_{SC} = 0.037^*$     |
|                                        | Within regions             | 454.523  | 1.53091  | 90.63 | $F_{ST} = 0.094^*$     |

†Differences in the significance of similar percentages of variation are due to the number of markers computed in each case.

**Table S6.** Hierarchical AMOVA on Atlantic and Mediterranean hake regions and basins using nine subsets of microsatellites as classified per origin (random loci or EST-loci) as well as per selective role after BAYESCAN (neutral polymorphism vs. balanced polymorphism). SS, sum of squares; VC, variance component; %, percentage of variation;  $F$ , fixation index. \* indicates that the probabilities of the observed values were equal or smaller than expected by random ( $p \leq 0.01$ ); <sup>ns</sup>, non-significant  $p$ -value.

| Hierarchical Level                  | Source of variation        | SS       | VC       | %     | $F$                          |
|-------------------------------------|----------------------------|----------|----------|-------|------------------------------|
| <b>Microsatellite source</b>        |                            |          |          |       |                              |
| 5 anonymous loci                    | Between basins             | 11.848   | 0.04101  | 1.81  | $F_{CT} = 0.018^{ns\dagger}$ |
|                                     | Among regions within basin | 16.143   | 0.04880  | 2.16  | $F_{SC} = 0.022^*$           |
|                                     | Within regions             | 729.642  | 2.17240  | 96.03 | $F_{ST} = 0.040^*$           |
| 21 EST-loci                         | Between basins             | 41.542   | 0.16266  | 1.79  | $F_{CT} = 0.018^*$           |
|                                     | Among regions within basin | 55.084   | 0.17940  | 1.97  | $F_{SC} = 0.020^*$           |
|                                     | Within regions             | 2473.055 | 8.75424  | 96.24 | $F_{ST} = 0.038^*$           |
| 26 loci (5 anonymous and 21 EST)    | Between basins             | 53.390   | 0.20366  | 1.79  | $F_{CT} = 0.018^*$           |
|                                     | Among regions within basin | 71.227   | 0.22820  | 2.01  | $F_{SC} = 0.020^*$           |
|                                     | Within regions             | 3202.697 | 10.92664 | 96.20 | $F_{ST} = 0.038^*$           |
| <b>Neutral microsatellites</b>      |                            |          |          |       |                              |
| 2 anonymous and neutral loci        | Between basins             | 9.068    | 0.04414  | 5.08  | $F_{CT} = 0.051^{ns\dagger}$ |
|                                     | Among regions within basin | 6.412    | 0.02269  | 2.61  | $F_{SC} = 0.028^*$           |
|                                     | Within regions             | 238.069  | 0.80162  | 92.31 | $F_{ST} = 0.077^*$           |
| 18 EST and neutral loci             | Between basins             | 38.213   | 0.15205  | 1.96  | $F_{CT} = 0.020^*$           |
|                                     | Among regions within basin | 49.517   | 0.17191  | 2.22  | $F_{SC} = 0.023^*$           |
|                                     | Within regions             | 2027.982 | 7.41785  | 95.82 | $F_{ST} = 0.042^*$           |
| 20 neutral (2 anonymous and 18 EST) | Between basins             | 47.282   | 0.19619  | 2.28  | $F_{CT} = 0.023^*$           |
|                                     | Among regions within basin | 55.928   | 0.19459  | 2.26  | $F_{SC} = 0.023^*$           |
|                                     | Within regions             | 2266.050 | 8.21948  | 95.46 | $F_{ST} = 0.045^*$           |
| <b>Balanced microsatellites</b>     |                            |          |          |       |                              |
| 3 anonymous and selective loci      | Between basins             | 2.779    | -0.00313 | -0.22 | $F_{CT} = 0.000^{ns}$        |
|                                     | Among regions within basin | 9.732    | 0.02611  | 1.87  | $F_{SC} = 0.019^*$           |
|                                     | Within regions             | 491.573  | 1.37077  | 98.35 | $F_{ST} = 0.016^*$           |
| 3 EST and selective                 | Between basins             | 3.329    | 0.01060  | 0.78  | $F_{CT} = 0.008^{ns}$        |
|                                     | Among regions within basin | 5.568    | 0.00749  | 0.55  | $F_{SC} = 0.006^{ns}$        |
|                                     | Within regions             | 445.073  | 1.33639  | 98.66 | $F_{ST} = 0.013^*$           |
| 6 balanced loci                     | Between basins             | 6.108    | 0.00747  | 0.27  | $F_{CT} = 0.003^{ns}$        |
|                                     | Among regions within basin | 15.299   | 0.03361  | 1.22  | $F_{SC} = 0.012^*$           |
|                                     | Within regions             | 936.647  | 2.70716  | 98.51 | $F_{ST} = 0.015^*$           |

<sup>†</sup>Differences in the significance of similar percentages of variation are due to the number of markers computed in each case.

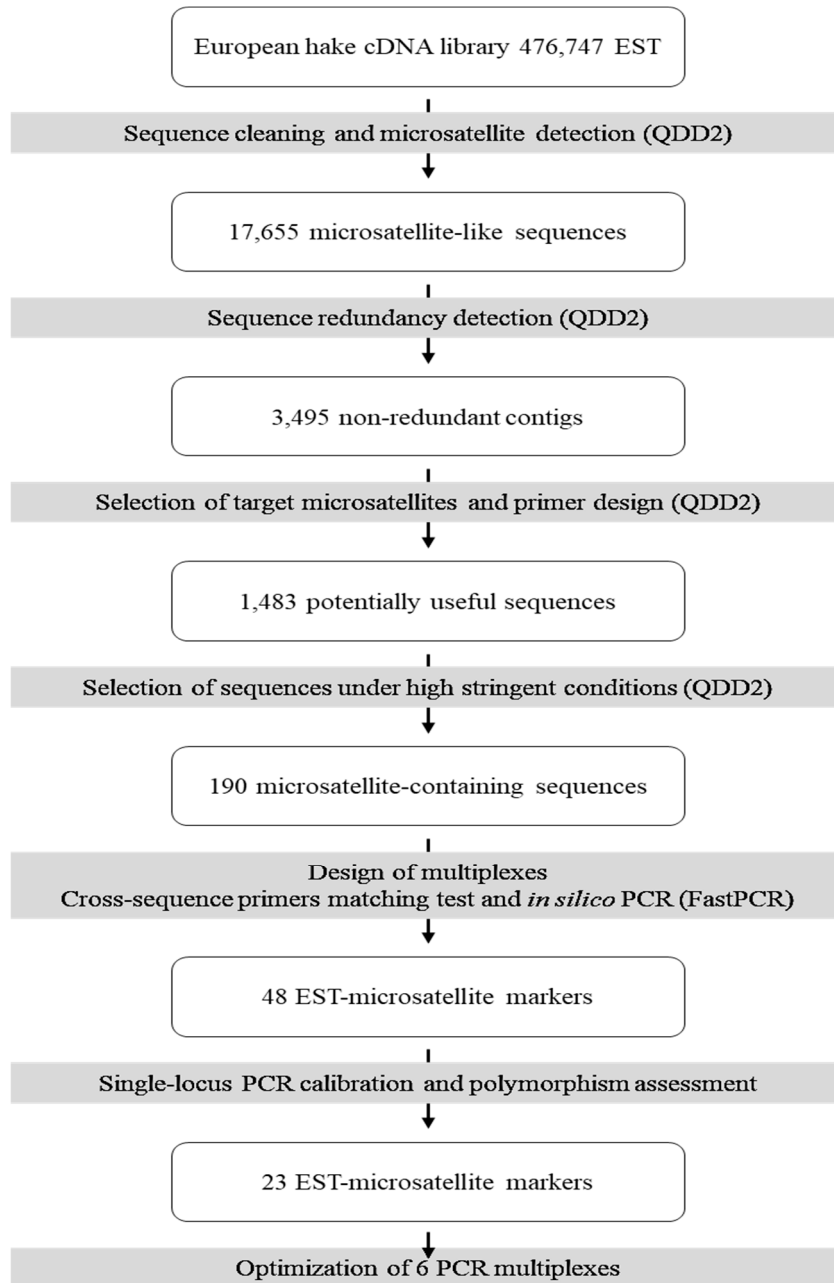

**Figure S1.** Roadmap for EST-microsatellite annotation from a transcriptomic cDNA library of the European hake and design of PCR multiplexes (see Table S1).
